1 **Fecal bile acid profiles predict recurrence in patients with primary *Clostridioides difficile***  
2 **infection**

3 Benjamin H. Mullish<sup>1,2\*</sup>, Laura Martinez-Gili<sup>1,3\*</sup>, Elena Chekmeneva<sup>4,5</sup>, Gonçalo D. S.  
4 Correia<sup>4,5</sup>, Matthew R. Lewis<sup>4,5</sup>, Verena Horneffer-Van Der Sluis<sup>4,5,6</sup>, Julie A. K. McDonald<sup>7</sup>,  
5 Alexandros Pechlivanis<sup>5,8,9</sup>, Julian R. F. Walters<sup>1,2</sup>, Emma L McClure<sup>10</sup>, Julian R. Marchesi<sup>1</sup>,  
6 Jessica R. Allegretti<sup>10,11f</sup>

7  
8 *Affiliations:*

9 <sup>1</sup>Division of Digestive Diseases, Department of Metabolism, Digestion and Reproduction,  
10 Faculty of Medicine, St Mary's Hospital Campus, Imperial College London, London, United  
11 Kingdom

12 <sup>2</sup>Departments of Gastroenterology and Hepatology, St Mary's Hospital, Imperial College  
13 Healthcare NHS Trust, Paddington, London, UK

14 <sup>3</sup>Section of Bioinformatics, Division of Systems Medicine, Department of Metabolism,  
15 Digestion and Reproduction, Faculty of Medicine, Imperial College London, London, United  
16 Kingdom

17 <sup>4</sup>National Phenome Centre, Department of Metabolism, Digestion and Reproduction,  
18 Faculty of Medicine, IRDB Building, Hammersmith House Campus, Imperial College London,  
19 London, United Kingdom

20 <sup>5</sup>Section of Bioanalytical Chemistry, Division of Systems Medicine, Department of  
21 Metabolism, Digestion and Reproduction, Imperial College London, London, United Kingdom

22 <sup>6</sup>Department for Diagnostics, Institute for Clinical Chemistry and Laboratory Medicine,  
23 University Hospital Hamburg-Eppendorf, Hamburg, Germany

24 <sup>7</sup>MRC Centre for Molecular Bacteriology and Infection, Imperial College London, London, UK

25 <sup>8</sup>Laboratory of Analytical Chemistry, Department of Chemistry, Aristotle University of  
26 Thessaloniki, Thessaloniki, Greece

27 <sup>9</sup>Biomic\_Auth, Bioanalysis and Omics Laboratory, Center for Interdisciplinary Research and  
28 Innovation (CIRI-AUTH), Thessaloniki, Greece

Main Manuscript

29 <sup>10</sup>Division of Gastroenterology, Hepatology, and Endoscopy, Brigham and Women's Hospital,  
30 Boston, Massachusetts, USA

31 <sup>11</sup>Harvard Medical School, Boston, Massachusetts, USA

32

33 \*Joint first authors

34 <sup>†</sup>Corresponding author

35

36 **Postal address:** Dr Jessica R Allegretti  
37 Division of Gastroenterology, Hepatology and Endoscopy  
38 Brigham and Women's Hospital  
39 850 Boylston Street, Suite 201  
40 Chestnut Hill  
41 MA 02467  
42 USA

43 **Email:** [jallegretti@bwh.harvard.edu](mailto:jallegretti@bwh.harvard.edu)

44 **Telephone:** +001-617-732-6389

45 **Fax:** +001-617-732-9198

46

47 **Word count:** 5042

48

49 **Keywords:** metabolomics; bile acids; *Clostridioides difficile* infection

50

51 **Acknowledgements:** Nil.

52

53 **Disclosures:** BHM has received consultancy fees from Finch Therapeutics Group  
54 and Ferring Pharmaceuticals, outside of the submitted work. JRFW  
55 has received consultancy fees from GE Healthcare, Intercept  
56 Pharmaceuticals, and Novome Biotechnologies outside the submitted  
57 work. JRM has received consultancy fees from EnteroBiotix Ltd.,  
58 outside of the submitted work. JRA has consulted for Finch

*Main Manuscript*

59 Therapeutics Group, Seres, Pfizer, Janssen, Bristol Myer Squibb,  
60 Artugen, Iterative Scopes, Lilly, Merck and Abbvie, and has research  
61 support from Merck and Pfizer.

62

63 **Funding:** The clinical studies were funded by a Junior Faculty Development  
64 Award from the American College of Gastroenterology for JRA.  
65 Metabolomics studies were performed at the MRC-NIHR National  
66 Phenome Centre at Imperial College London; this centre receives  
67 financial support from the Medical Research Council (MRC) and  
68 National Institute of Health Research (NIHR) (grant number  
69 MC\_PC\_12025). BHM is the recipient of an NIHR Academic Clinical  
70 Lectureship (CL-2019-21-002) and was formerly in receipt of a MRC  
71 Clinical Research Training Fellowship (MR/R000875/1). The Division of  
72 Digestive Diseases and MRC-NIHR National Phenome Centre at  
73 Imperial College London receive financial and infrastructure support  
74 from the NIHR Imperial Biomedical Research Centre (BRC) based at  
75 Imperial College Healthcare NHS Trust and Imperial College London.

76

77 1. **Abstract:**

78 **Background:** Factors that influence recurrence risk in primary *Clostridioides difficile*  
79 infection (CDI) are poorly understood, and tools to predict recurrence are lacking.  
80 Perturbations in microbial-derived bile acids (BAs) contribute to CDI pathogenesis and may  
81 be relevant to primary disease prognosis.

82 **Aims:** To define stool bile acid profiles and microbial bile-metabolising functionality in  
83 primary CDI patients, and explore signatures predicting recurrence.

84 **Methods:** Weekly stool samples were collected from primary CDI patients from the last day  
85 of anti-CDI therapy until recurrence, or through eight weeks post-completion otherwise.  
86 Ultra-high performance liquid chromatography-mass spectrometry (UHPLC-MS) was used to  
87 profile bile acids, and bacterial bile salt hydrolase (BSH) activity was measured to determine  
88 primary BA deconjugation capacity. Multivariate and univariate models were used to define  
89 differential BA trajectories in recurrers *versus* non-recurrers, and assess fecal bile acids as  
90 predictive markers for recurrence.

91 **Results:** Twenty (36%) out of 56 patients (median age 57, 64% male) recurred, with 80% of  
92 recurrence occurring within the first nine days post-antibiotic treatment. Principal  
93 component analysis (PCA) of stool bile acid profiles demonstrated clustering of samples by  
94 recurrence status and post-treatment time point. Longitudinal fecal bile acid trajectories in  
95 non-recurrers showed a recovery of secondary bile acids and their derivatives in non-  
96 recurring patients that was not observed in recurrers. BSH activity increased over time  
97 amongst patients who did not relapse ( $\beta = 0.056$ ; likelihood ratio test  $p = 0.018$ ). A joint  
98 longitudinal-survival model identified five stool bile acids with AUROC > 0.73 for prediction  
99 of recurrence within nine days post-CDI treatment.

100 **Conclusions:** Gut bile acid metabolism dynamics differ in primary CDI patients between  
101 those who develop recurrence versus those who do not. Individual bile acids show promise  
102 in primary CDI patients as potential novel biomarkers to predict CDI recurrence.

103

104

105 **2. Introduction:**

106 *Clostridioides difficile* infection (CDI) continues to present a considerable global disease  
107 burden, with an estimated annual incidence of 462,100 cases in the USA alone on latest  
108 assessment, and this trend is expected to increase as antimicrobial resistance is predicted to  
109 grow worldwide [1]. While a growing proportion of cases appear to be community-acquired  
110 [2], CDI remains the major cause of hospital-acquired gastrointestinal infection [3], leading  
111 to increased hospitalization time [4], clinical complications and mortality [5]. Furthermore,  
112 CDI is associated with considerable healthcare expenditure, equating to \$1.5 billion annually  
113 within the USA [6].

114

115 Recurrent CDI remains a major clinical challenge. A key clinical dilemma in the management  
116 of CDI patients is prediction of the risk of recurrence caused by either re-exposure to *C.*  
117 *difficile* or reactivation of dormant spores within vulnerable patients. The rate of recurrence  
118 within eight weeks following treatment for a primary episode of CDI is 15-25%, and rises as  
119 high as 40-60% for patients experiencing further recurrences [7,8]. Updated CDI clinical  
120 guidelines recognise that the risk of recurrence in primary CDI patients may influence the  
121 preferred management approach and the need for preventative strategies, such as the  
122 potential benefit for bezlotoxumab in primary CDI patients with higher recurrence risk  
123 compared to those with lower risk [9,10]. However, at present, limited tools exist for the  
124 prediction of CDI recurrence [11], with risk of recurrence estimation based upon the use of  
125 clinical criteria (including age, immunocompromise, and severity of CDI at diagnosis [9,12]).  
126 The dynamic assessment of biomarkers could be important not only to stratify low- and  
127 high-risk patients, but also to further understand the mechanisms underlying recurrence.

128

129 One such biological area of interest relates to the contribution of gut microbiota-bile acid  
130 interactions to the pathogenesis of CDI [13]. Prior antibiotic exposure is well-established as  
131 the major risk factor for CDI [14] and entails a loss of microbial community members  
132 possessing bile-metabolising enzymes (including bile salt hydrolases (BSHs) and 7- $\alpha$ -  
133 dehydroxylase) [15–18]. More specifically, the antibiotic-exposed gut develops enrichment  
134 in primary bile acids (including taurocholic acid (TCA), a major pro-germinant trigger to *C.*  
135 *difficile* [19]), and loss of secondary bile acids, that have established roles in restricting the  
136 growth of *C. difficile* and its toxin activity [20,21] and in modulating regulatory T cell activity

*Main Manuscript*

137 [22]. In addition, CDI is also characterised by reduced activity in the farnesoid X receptor  
138 (FXR)-fibroblast growth factor (FGF) axis, important for bile acid homeostasis [23]. Fecal bile  
139 acid profiles have shown promise for differentiating non-CDI diarrhea from CDI-related  
140 diarrhea [24].

141

142 Our recent analysis of clinical factors in a cohort of patients experiencing a first episode of  
143 uncomplicated CDI, demonstrated that primary diagnosis of CDI via toxin enzyme  
144 immunoassay (EIA) and treatment with metronidazole were both factors increasing the risk  
145 of recurrence [25]. Extending upon this work, we here present an analysis of longitudinal  
146 fecal bile acid dynamics after anti-CDI therapy cessation until recurrence or until 8 weeks  
147 post-therapy of patients within this cohort, with the joint aims of better delineating  
148 differences in microbiome-bile acid interactions in patients with primary CDI who recur or  
149 not, and in identifying potential biomarkers that may predict future CDI recurrence.

150

151 **3. Methods:**

152 **3.1. Patient cohort:**

153 This cohort has been previously-described [25]. In brief, all participating patients were  
154 recruited from the inpatient service at Brigham and Women's Hospital (BWH; Boston, USA)  
155 as well as two surrounding community hospitals (Brigham and Women's Faulkner Hospital  
156 and Newton Wellsley Hospital). Potentially eligible patients were identified by daily reports  
157 of patients with positive stool tests for *C. difficile* provided by the BWH Clinical Microbiology  
158 Laboratory. *C. difficile* infection was defined as the presence of diarrhea, positive laboratory  
159 tests (i.e. glutamate dehydrogenase (GDH) and EIA toxin or polymerase chain reaction for  
160 toxin B, depending upon the testing methods used at the associated hospital laboratory),  
161 and clinician decision to treat the patient for CDI. Primary CDI was defined as no prior  
162 episodes of CDI within the prior six months. Patients who were excluded were: patients with  
163 inflammatory bowel disease; patients with inherited or acquired immunodeficiencies;  
164 severe or fulminant CDI, as diagnosed by IDSA and/or ACG guidelines [9,10]; or the need for  
165 ongoing non-CDI antibiotic use that continued past the CDI antibiotic course.

166

167 Participating patients were recruited at the time of CDI diagnosis and samples collected  
168 through eight weeks post-completion of their anti-CDI therapy to assess for recurrence, with

*Main Manuscript*

169 clinical assessments regarding presence or absence of diarrhea occurring at each time point.  
170 Active stool collection began one week after completing anti-CDI antibiotics; stool was  
171 collected up to twice a week for the first two weeks post-therapy completion, and then  
172 weekly through to week eight. Recurrence was suspected if participants developed diarrhea  
173 (Bristol stool scale 6-7) and at least three bowel movements daily for three days; if these  
174 criteria were met, stool was assayed for *C. difficile* via GDH/EIA, and patients were  
175 considered to have had a recurrence if both assays were positive. While 75 patients were  
176 part of the original clinical cohort [25], only 56 had provided post-treatment serial stool  
177 samples, and hence the present study has an effective  $n=56$ . The Institutional Review Board  
178 (IRB) of Brigham and Women's Hospital gave ethical approval for this work. In addition, a  
179 UK National Research Ethics Center (13/LO/1867) also gave ethical approval for this.

180

181 **3.2. Bile acid profiling:**

182 Fecal samples were analysed using ultra-high performance liquid chromatography-mass  
183 spectrometry (UHPLC-MS). The protocols used for fecal extract preparation [26] and spectra  
184 acquisition [18,27] were as previously-described.

185

186 Fecal extracts were prepared by extracting from lyophilized dried fecal samples using a 2:1:1  
187 (vol) mixture of water, acetonitrile and 2-propanol to 10mg/mL, via use of a Biospec bead  
188 beater with 1.0mm Zirconia beads followed by centrifugation (16,000× $g$ , 20min) and  
189 filtering the supernatant through 0.45µm microcentrifuge filters (Costar, Corning). Pooled  
190 study reference (SR) samples, used as quality control of the profiling data and to monitor  
191 assay performance, were prepared using equal parts of the fecal filtrates. In addition, for  
192 assessment of linearity of analyte response [28], a series of SR sample dilutions was created  
193 by diluting with ice-cold LC-MS grade methanol to the concentrations of 100%, 80%, 60%,  
194 40%, 20%, 10%, 1% and analyzed at the start and end of each set of sample analyses.

195

196 Study and pooled SR samples were prepared for the UHPLC-MS profiling by aliquoting 75 µL  
197 of filtered fecal extracts onto a 96-well plate and adding 75 µL of LCMS grade water and 75  
198 µL of internal standard (IS) solution, followed by the addition of 75 µL of water to each well  
199 for study samples, and 75 µL of ice-cold LC-MS grade methanol to each well for study  
200 samples. Samples were mixed for two minutes on a plate mixer (1400 rpm at 2-8 °C),

*Main Manuscript*

201 incubated at -20 °C for 4 hours, then mix briefly and centrifuged at 3486xg for 10 minutes at  
202 4 °C. Aliquots of 125 µL of clear supernatants of each sample were carefully transferred to  
203 an analytical 96-well plate that was heat sealed and placed into the autosampler maintained  
204 at 4 °C for the analysis. Blank samples were prepared in the same way but with an empty  
205 tube (i.e. processing neat extraction solution through all steps, including the filter, allowing  
206 tracing back of contamination peaks if present).

207

208 ACQUITY UHPLC-MS (Waters Ltd., Elstree, UK) coupled to a Xevo G2-S Q-ToF mass  
209 spectrometer with an electrospray ionization source operating in negative ion mode (ESI-)  
210 (Waters, Manchester, UK) was used for bile acids profiling. LC separation was conducted on  
211 a ACQUITY BEH C8 column (1.7 µm, 100 mm × 2.1 mm) maintained at 60 °C. A gradient was  
212 applied consisting of 10:1 water:acetonitrile, 1 mM ammonium acetate, pH 4.15 (A) and 1:1  
213 isopropanol: acetonitrile (B). Details of the linear gradient method 90% A to 65% are  
214 described elsewhere [18]. Injection volume was of 5 µL.

215

216 Mass spectrometry parameters were as follows: capillary voltage was set at 1.5 kV, cone  
217 voltage at 60 V, source temperature at 150 °C, desolvation temperature at 600 °C,  
218 desolvation gas flow at 1000 L/h, and cone gas flow at 150 L/h. Masslynx software (Waters,  
219 Manchester, U.K.) was used for data acquisition and visual inspection.

220

221 A total of 81 bile acid authentic chemical standards were used to help annotation of  
222 endogenous bile acids in fecal samples. The standards were split into eight mixtures  
223 prepared in 1:3 water: methanol mixture and analyzed in the beginning and the end of the  
224 run. The standards were also spiked into pooled SR sample analyzed across the run. This  
225 helped monitor any potential retention time shifts for each bile acid species and to  
226 determine retention time windows (regions of interest) used as an input together with *m/z*  
227 values for the targeted extraction and integration of annotated bile acids using peakPanther  
228 package [27].

229

230 Waters .RAW LC-MS data files were converted to .mzML format using Proteowizard  
231 msconvert [29], with removal of signals with less than 100 ion counts. A total of 81 bile acid  
232 species were annotated using authentic reference standards to determine their retention



Main Manuscript

233 times and their relative abundance integrated with the R package, peakPanther [30]. To  
234 adjust for spectra intensity decay along the run, each feature was divided by a LOWESS  
235 curve fitted on the SR samples' intensity [31]. Features with a coefficient of variation greater  
236 than 30% in normalised SR samples, with a Pearson correlation with dilution factor below  
237 0.7 (estimated using a dilution series of pooled SR samples), or below LOD in more than 20%  
238 of study samples were discarded. Drift-correction and feature filtering were performed with  
239 the nPYc-Toolbox [32]. Features were log-transformed and zeros imputed using  
240 impute.QRILC from the *imputeLCMD* R package. For statistical analyses, features were also  
241 mean-centered.

242

243 **3.3. Bile salt hydrolase activity assays:**

244 A spectrophotometry-based assay was used to assess the activity of microbial bile salt  
245 hydrolase (BSH) in a subset of stool samples from the cohort, as previously-described [26].

246

247 **3.4. Data analysis and statistics:**

248 Statistical analyses were performed in R. Principal component analysis (PCA) of the  
249 processed UHPLC-MS bile acid profiling data was performed using the *ropIs* R package[33].  
250 Bile acid longitudinal trajectories were fitted using mixed effects models with the R package  
251 *nlme*, stratifying samples by recurrence, with time (transformed as square root of days for  
252 ease of modelling and visualisation; **Supplementary Figure 1**) as a co-variate and subject as  
253 random intercept and time slope effect. For each feature, log-likelihood ratio tests of nested  
254 models were used to determine the addition of non-linear (squared and cubic) time terms.  
255 Area under the curve (AUC) of subject-specific fitted bile acid trajectories up to the  
256 maximum timepoint of recurrence was calculated with *pracma* function *trapz* and compared  
257 across recurring and non-recurring patients using a Mann-Whitney test, with Benjamini-  
258 Hochberg false discovery rate correction (FDR) for multiple testing applied. FDR-adjusted P-  
259 values ( $P_{adj}$ ) < 0.1, corresponding to a 10 % false discovery rate, were considered significant.

260

261 To assess if bile acids contributed to recurrence, a Bayesian method was used to jointly  
262 model bile acid longitudinal changes with the hazard risk of recurrence using  
263 *jointModelBayes* function in the *JMbayes* package [34] with default parameters. The joint  
264 survival model included age, gender, previous antibiotics (yes/no), *C. difficile* antibiotic type

*Main Manuscript*

265 (vancomycin/metronidazole) and diagnostic test (immunoassay/PCR) as covariates. Mean  
266 area under the receiver operating characteristic curve (AUROC) was calculated for each  
267 feature with the rocJM method from JMBayes package, using 1,000 Monte Carlo  
268 permutations of training sets randomly built with 80% of recurrers' and 80% of non-  
269 recurrers' samples and the remaining 20% of samples as test set. Three sets of ROC curves  
270 were built using only one, two or three first timepoints of longitudinal bile acid  
271 measurements to predict recurrence within nine days post-treatment.

272

273 **4. Results:**

274 **4.1. Participant details:**

275 Key clinical details of the 56 included patients are presented in **Table 1**. No patients had  
276 received treatment with ursodeoxycholic acid, and two patients were treated with bile acid  
277 sequestrants (one with colestipol, one with cholestyramine). Out of the 56 patients, 20  
278 (36%) developed recurrence, with 80% of recurrence occurring within the first nine days  
279 post-antibiotic treatment.

280

281 **4.2. Timepoint since diagnosis and recurrence status influence fecal bile acid profile in**  
282 **primary CDI:**

283 In total, 71 bile acids were detected and relatively quantified in the peakPanther dataset  
284 (see **Supplementary Table 1** for full list of bile acids).

285

286 We first sought to explore the overall impact of recurrence status and post-treatment  
287 sampling time upon fecal bile acid profiles; as such, sample profiles were first visualised  
288 using multivariate statistical analysis. On principal component analysis (PCA) of the  
289 annotated bile acid profiles of all included samples and time points ( $n=273$ ), samples  
290 clustered mostly according to timepoint of sampling and by recurrence status of the patient  
291 (**Figure 1A**). Individual trajectories showed that patients who did not recur had more  
292 pronounced dynamic changes in their fecal bile acid composition than those who recurred  
293 (**Figure 1B**); this higher temporal variability in non-recurrers was reflected in the comparison  
294 of mean Euclidean distance of within-individual longitudinal samples collected the first nine  
295 days post-treatment, which showed a higher - but not significant - dissimilarity in bile acid  
296 composition across time in non-recurrers (Wilcoxon  $p = 0.13$ ; **Figure 1C**).

297

298 **4.3. Recovery of microbial bile acid metabolism and restoration of the pre-morbid bile**  
299 **acid milieu occurs in primary CDI patients without recurrence:**

300 To explore the temporal changes in bile acid metabolism in patients recovering from  
301 primary CDI – and how recurrence may impact upon this – we compared the longitudinal  
302 trajectories (across days to weeks) of fecal bile acids for the 20 patients experiencing  
303 recurrence *versus* those 36 with no recurrence (**Figure 2A, B and C**).

304

305 Of the identified/ annotated bile acids, 24 were found to have marked differences in  
306 longitudinal trajectories, assessed via comparison of area under curve (AUC) of subject-  
307 specific trajectories among recurrence vs no recurrence (**Figure 2C and Supplementary**  
308 **Table 1**). Two of the fecal bile acids with the most marked difference in AUC between  
309 recurrers and non-recurrers were the secondary bile acids DCA and LCA, with AUCs for both  
310 significantly higher in the non-recurring patients (DCA:  $P_{adj} = 2.3 \times 10^{-5}$ ; LCA:  $P_{adj} = 4.1 \times 10^{-3}$ ,  
311 Mann-Whitney with Benjamini-Hochberg FDR; **Figure 2A**). Other fecal bile acid AUCs that  
312 strongly differentiated recurrence from non-recurrence (with larger AUC in non-recurrers)  
313 were particularly notable for also being secondary bile acids, and particularly derivatives of  
314 DCA and LCA. This included glycine-conjugated forms (glycoDCA and glycoLCA;  $P_{adj} = 2.4 \times 10^{-5}$   
315 and  $6.6 \times 10^{-3}$  respectively, Mann-Whitney with Benjamini-Hochberg FDR), as well as forms  
316 presumably derived from microbial hydroxysteroid dehydrogenase (HSDH) activity: isoDCA  
317 (5- $\beta$ -Cholanic Acid-3- $\beta$ , 12- $\alpha$ -diol;  $P_{adj} = 2.3 \times 10^{-5}$ ), the 3 $\beta$ -HSDH-derived epimer of DCA; 3-  
318 oxoDCA (5- $\beta$ -Cholanic Acid 12- $\alpha$ -ol-3-one;  $P_{adj} = 7.3 \times 10^{-5}$ ), the 3 $\alpha$ -HSDH-mediated  
319 dehydrogenation of DCA; and 12-ketoDCA (3- $\alpha$ -Hydroxy-12-ketolithocholic acid;  $P_{adj} =$   
320  $7.3 \times 10^{-5}$ ), the 12 $\alpha$ -HSDH-mediated dehydrogenation of DCA. In contrast, participants  
321 experiencing recurrence (relative to those with non-recurrence) had higher AUC levels of  
322 primary bile acid derivatives, sulfated and/or amide-conjugated ursodeoxycholic acid  
323 (UDCA), or those similar to the 5 $\beta$ -cholanic acid (ursocholanic acid) skeleton from which all  
324 bile acids are derived; this included glycoursocholanic acid ( $P_{adj} = 2.5 \times 10^{-5}$ ), chenodeoxycholic  
325 acid-3-sulfate ( $P_{adj} = 0.027$ ), as well as a number of oxo-derivatives of cholic acid, i.e. 3,7,12-  
326 dehydrocholic acid, 3- $\alpha$ -hydroxy-7,12-diketocholeic acid, and 12-dehydrocholic acid|7-  
327 dehydrocholic acid ( $P_{adj} = 6.7 \times 10^{-4}$ ,  $2 \times 10^{-3}$  and 0.012 respectively).

328

329 Microbial bile salt hydrolases (BSH) are widely-distributed amongst bacteria resident in the  
330 gut, and their action (in removing the taurine or glycine groups of primary bile acids  
331 secreted into the gut) is the key rate-limiting step for microbiota-mediated  $7\alpha/\beta$ -  
332 dehydroxylation within the gastrointestinal tract [35]. Predicted bile salt hydrolase gene  
333 abundance has previously been demonstrated by our group to be reduced in stool in  
334 patients with recurrent CDI compared to those with primary CDI or control patients [15];  
335 however, no comparison of BSH dynamics between recurring vs. non-recurring primary CDI  
336 patients has been described previously. As such, we undertook BSH activity assays on a  
337 subset of primary CDI patients who experienced CDI recurrence ( $n=9$ ) and those with non-  
338 recurrence ( $n=18$ ). BSH activity increased over time amongst patients who did not relapse  
339 ( $\beta= 0.056$ ; likelihood ratio test  $p= 0.018$ ; **Figure 3A**), while not enough data points were  
340 available to test changes in BSH activity over time in patients who relapsed. Comparison of  
341 BSH activity in recurrers vs. non-recurrers showed no significant difference in activity one  
342 day after antibiotic treatment cessation (Wilcoxon,  $p= 0.83$ ), and a trend towards a lower  
343 BSH activity in patients who recurred at the latest timepoints measured, corresponding to a  
344 mean  $\pm$  SD of  $8 \pm 7$  days for recurrers and  $35 \pm 5$  days for non-recurrers (Wilcoxon,  $p= 0.078$ ;  
345 **Figure 3B**).

346

347 **4.4. Fecal bile acid profiles immediately following antibiotic treatment for primary CDI**  
348 **are related to risk of recurrence, and may be a predictive tool for recurrence:**

349 Comparison of AUC under the longitudinal trajectories allowed us to evaluate the overall  
350 recovery of bile acid species over a time interval, but it does not provide information on the  
351 imminent effect bile acids have on the risk of recurrence at a discrete timepoint. More  
352 specifically, it would be of clear clinical interest if it was feasible to use a 'snapshot' fecal bile  
353 acid profile obtained soon after the end of antibiotic treatment for primary CDI and use this  
354 to gain insight into future recurrence risk. As such, we sought to further investigate the  
355 relationship of specific bile acids to recurrence risk, and whether they had potential utility in  
356 use as a predictive marker of recurrence.

357

Main Manuscript

358 To explore the contribution of fecal bile acids to the risk of recurrence, we undertook a  
359 Bayesian joint longitudinal and survival modelling approach [34] (**Figure 4A** and  
360 **Supplementary Table 2**). We found 16 bile acids associated with increased risk of  
361 recurrence, while 15 were associated with reduced risk. Particularly noteworthy was the  
362 marked increased risk of recurrence associated with fecal ursocolanic acid ( $p=0.006$ ),  
363 together with its conjugated derivatives, glycoursocholic acid ( $p<0.001$ ) and  
364 tauroursocholic acid ( $p=0.034$ ). In addition, UDCA and its sulfated and tauro-conjugated  
365 forms were also positively associated with recurrence. Conversely, it was noteworthy that  
366 those bile acids most strongly associated with a reduced risk of recurrence were  
367 predominantly glycine-conjugated primary bile acids, DCA and LCA, with many of them also  
368 sulfated (**Figure 4A**).

369

370 We next aimed to assess the model's performance in predicting recurrence in patients with  
371 primary CDI using fecal bile acid profiles. Given the time frame at which recurrences occur  
372 both within this study and in clinical practice more generally, we modelled prediction of  
373 recurrence within the 9 first days post-treatment, focusing on using only the measurements  
374 of post-treatment day 1, as it would be more translatable to clinical practice than  
375 conducting daily fecal samplings and BA measurements (**Figure 4D**). Area under the receiver  
376 operating characteristic curve (AUROC) showed good prediction of recurrers within 9 days  
377 post-treatment by 5- $\alpha$ -cholanic acid-3, 6-dione (AUROC=0.81; **Figure 4D**). Four other fecal  
378 bile acids were also identified to have AUROCs > 0.73 for prediction of recurrence (**Figure**  
379 **4D**). When using two or three consecutive measurements, 5- $\alpha$ -cholanic acid-3, 6-dione  
380 continued to be the best predictor of recurrence, but AUROC was slightly smaller (0.79 and  
381 0.78, respectively) (**Figure 4B, 4C**), suggesting that measuring 5- $\alpha$ -cholanic acid-3, 6-dione  
382 on the first day post-treatment might be sufficient to predict the risk of recurrence.

383

## 384 5. Discussion:

385 The body of evidence supporting a close interaction between perturbed gut microbiota-  
386 mediated bile acid metabolism and risk of CDI has been growing over the past decade [13],  
387 and particularly regarding the impact of enriched gut TCA and loss of gut secondary bile  
388 acids (particularly DCA and LCA) that characterise the CDI gut upon the ability of *C. difficile*

Main Manuscript

389 to undergo germination, vegetative growth, and toxin activity. However, to date, relatively  
390 limited data has been described on the degree to which this axis is perturbed in primary CDI  
391 specifically, and – if so – whether it might be exploitable as a biomarker to predict  
392 recurrence within this condition.

393

394 Previous work from our laboratories described enrichment in gut primary bile acids and loss  
395 of secondary bile acids in patients with both primary and recurrent CDI, together with  
396 reduced predicted stool *bsh* gene abundance in recurrent CDI compared to primary CDI or  
397 controls; however, this was assessed only cross-sectionally rather than longitudinally [15].  
398 One confounder in interpreting cross-sectional datasets in CDI (particularly primary CDI) is  
399 that vancomycin (the major anti-CDI therapy that most participants are initially treated  
400 with) has itself been associated with an altered gut microbiota profile, as well as by loss of  
401 fecal secondary bile acids and enrichment in primary unconjugated bile acids [36,37]. These  
402 data support and extend upon our previous results by demonstrating different dynamics of  
403 BSH functionality in recurrers compared to non-recurrers, as does the associated recovery  
404 of transition of primary to secondary bile acids and their derivatives (a further nuance in this  
405 system relates to the recent demonstration that different BSHs, due to their different  
406 substrate specificity, have different degrees of protective ability against CDI [38]). The  
407 conventional clinical interpretation of recurrence after an episode of primary CDI is to view  
408 this as a pathogen-derived event (e.g. related to re-exposure of a vulnerable host to *C.*  
409 *difficile*), and to respond with escalated or alternative anti-*C. difficile*-focused therapies;  
410 however, these data suggest that recurrence may alternatively be viewed as a failure of  
411 sufficient recovery of gut microbiome bile-metabolising functionality, and suggest by  
412 extension that targeted microbiome-focused therapies or bile acid co-treatments may have  
413 a potential role in mitigating the risk of recurrence. Supportive of this view, albeit from the  
414 context of recurrent rather than primary CDI, is the finding that a key mechanism underlying  
415 the efficacy of fecal microbiota transplant (FMT) in recurrent CDI is through restoration of  
416 microbial BSH functionality, and the associated restoration of a pre-morbid gut bile acid  
417 profile [18,39,40]. Similarly, both a spore-based ‘microbiome therapeutic’ derived from  
418 alcohol-shocked healthy donor stool and a live biotherapeutic product consisting of eight  
419 *Clostridia* strains were both shown to rapidly and sustainably restore stool secondary bile  
420 acids [41,42].

Main Manuscript

421

422 While much research to date on gut microbiome-bile acid interactions in the context of CDI  
423 has focused on the microbial enzymes BSH and 7- $\alpha$ -dehydroxylase [13], our data also give  
424 novel insight into disruption to complex additional interactions within this domain. For  
425 example, ursocolanic acid (also known as 5- $\beta$ -cholanic acid, the ‘skeleton’ from which  
426 other bile acids are derived, lacking the characteristic bile acid hydroxyl groups at positions  
427 3, 7 and 12) and its simple derivatives were demonstrated in both main models to be  
428 associated with adverse outcomes (i.e. higher AUCs in recurrers vs non-recurrers in the  
429 predicted individual longitudinal trajectories, and predictive of recurrence risk in the joint  
430 longitudinal-survival model). As another example, bile acids with oxo-/keto- groups  
431 appeared to associate with risk of recurrence across both models; this particularly applied to  
432 3-oxo groups (presumably representing gut microbial 3 $\alpha$ -hydroxysteroid dehydrogenase  
433 (HSDH) activity), with such bile acids more predictive of increased recurrence risk in the joint  
434 longitudinal-survival model. Conversely, one particularly interesting finding relates to  
435 isoDCA (5- $\beta$ -cholanic acid-3- $\beta$ , 12- $\alpha$ -diol), which was observed in both models to be  
436 associated with non-recurrence; this bile acid is the 3- $\beta$ -hydroxy epimer of DCA, with its  
437 presence in stool likely resulting from metabolism of DCA first via bacterial 3 $\alpha$ -HSDHs to 3-  
438 oxoDCA, before bacterial 3 $\beta$ -HSDH epimerization. As such, this suggests a role for gut  
439 microbial 3 $\beta$ -HSDH activity as being overall associated with protection from recurrence.  
440 This finding extends upon previous *in vitro* work demonstrating that a broad range of gut  
441 microbial derived secondary bile acids (including iso- forms) inhibit different aspects of the  
442 life cycle of *C. difficile* and its toxin activity [20]. The range of gut bacteria with 3 $\alpha$ -HSDH  
443 functionality is focused around (but not based purely within) the class of *Clostridia*, and  
444 includes a number of bacteria with other well-characterised bile-metabolising functionality,  
445 e.g. *Clostridium scindens*, the archetypal bacterium recognised to possess 7- $\alpha$ -  
446 dehydroxylation functionality [43]; bacteria with 3 $\beta$ -HSDH functionality include  
447 *Ruminococcus gnavus* [44]. This observation leads us to conclude that the presence/  
448 recovery of even very particular microbial bile-metabolising functions within the gut  
449 microbiota may be sufficient to profoundly affect clinical outcome. In particular, our data  
450 allows us to propose that primary CDI patients may typically retain gut bacterial 3- $\alpha$ -HSDH  
451 functionality, but only the additional presence of 3- $\beta$ -HSDH functionality results in reduced

Main Manuscript

452 recurrence risk; the presence of such functionality may represent gut microbiome recovery,  
453 and/or a gut environmental *milieu* supportive of activity of this enzyme (i.e. presence of  
454 required NADP(H), and appropriate pH and redox status [45]). The relevance of 3 $\beta$ -HSDH-  
455 mediated biotransformations of secondary bile acids to human health has been of recently-  
456 growing interest; one pertinent example of this is the recent demonstration that  
457 isoallothocholic acid produced from this enzyme system by *Odoribacteriaceae* strains had  
458 potent effects against the growth of *C. difficile* and other pathobionts [46]. Furthermore,  
459 isoLCA has recently been described to suppress pro-inflammatory T<sub>H</sub>17 cell differentiation,  
460 and to be at reduced levels in patients with colitis (at least colitis caused by IBD) [47].

461

462 A further interesting observation relates to the presence of UDCA and its derivatives as  
463 associating with increased risk of recurrence in the joint longitudinal model; this seems  
464 initially counterintuitive, given the apparent benefits associated with the exogenous use of  
465 UDCA in a rodent CDI model (albeit potentially more through their impact upon bile acid  
466 receptor systems rather than via direct effects on the life cycle of *C. difficile* [48]). However,  
467 a possible explanation may be related to the observation from our longitudinal model that  
468 no bile acids with 7- $\alpha$ -hydroxyl groups had higher AUCs in patients experiencing recurrence  
469 as compared to non-recrurers. From these data, we conclude that recovery over time of the  
470 7- $\alpha$ -dehydroxylase-driven transition from primary to secondary bile acids is a bacterial  
471 function that drives bile acid biotransformation in a way that reduces recurrence risk. By  
472 possessing a 7 $\beta$  group, UDCA is not readily acted upon by 7- $\alpha$ -dehydroxylase-producing  
473 bacteria, and may undergo downstream metabolism via more unconventional routes [49]  
474 such as isomerization back to 7 $\alpha$  and then 7 $\alpha$ -dehydroxylation, or direct 7 $\beta$ -  
475 dehydroxylation to LCA, that have less impact than immediate 7- $\alpha$ -dehydroxylation of  
476 primary bile acids upon direct bile acid-*C. difficile* interactions.

477

478 Extending upon this recognition of the centrality of microbiome-bile interactions in CDI  
479 outcomes - coupled with the current lack of clinical biomarkers to prognosticate recurrence  
480 in primary CDI - we further explored whether stool bile acid signatures may have utility as a  
481 predictive tool for recurrence of CDI. Work to date within this field is relatively limited,  
482 although we previously demonstrated that stool bile acid profiles could differentiate



*Main Manuscript*

483 primary from recurrent CDI with 84.2% accuracy [15], and fecal LCA (combined with urinary  
484 p-cresol sulfate) has been demonstrated to predict response to FMT for recurrent CDI with  
485 100% accuracy [50]. Our data here identifies at least five stool bile acids whose day 1 post-  
486 treatment measurement was enough to predict recurrence within 9 days with AUROC  
487 ranging from 0.81 to 0.73. This level of accuracy is similar to a previous study that used 16S  
488 rRNA gene sequencing of a single stool sample from each of 88 primary CDI patients to  
489 derive a microbial signature 'risk index' to predict recurrence, where an AUROC of 0.78 for  
490 prediction of recurrence was reported [51]. Collectively, data such as these suggest that  
491 microbiome and metabolome profiling in primary CDI may hold promise as accurate  
492 biologically-rationale biomarkers to predict recurrence. However, such studies would need  
493 replication in larger cohorts before they could be considered for use within clinical practice,  
494 and pragmatic aspects regarding use of such assays (i.e. time consuming multi-step aspect  
495 of sample preparation and batch effects in mass spectrometry analysis) would also require  
496 careful consideration. Regarding the actual bile acids that predicted recurrence, it was of  
497 particular interest that an unusual 'allo' bile acid - 5- $\alpha$ -cholanolic acid-3, 6-dione - was the  
498 most robust predictor of recurrence, especially since formation of allo bile acids is  
499 recognised to be a function of the gut microbiome of particular mammals (including rabbits  
500 and rates) but not of humans [52]; further work is needed to establish the potential  
501 biological significance of this bile acid to this disease state.

502

503 In conclusion, our data demonstrate distinctive differential gut bile acid trajectories that  
504 differentiate recurrence from non-recurrence in patients with primary CDI, and define the  
505 degree to which different gut bile acids associate with recurrence risk. These data extend  
506 upon existing knowledge regarding the influence of microbiome-mediated bile acid  
507 metabolism pathways upon clinical outcomes in CDI. By extension, these data suggest a  
508 clinical case for focus upon therapies targeted at recovery of microbiome-bile acid  
509 interactions to potentially reduce the risk of recurrence after primary CDI, and a feasible  
510 role for stool bile acids as novel, rationale biomarkers to predict CDI recurrence.

511

512 **Data availability:** The bile acid profiling data generated for this project is available on the  
513 MetaboLights Repository, study number: MTBLS657. All data produced in the present study  
514 are available upon reasonable request to the authors.

515

516

517 **Table Legends:**

518 **Table 1: Clinical details of study participants.**

519

520

521 **Figure Legends:**

522 **Figure 1: Initial multivariate statistical analysis of fecal bile acid profiles obtained from**  
523 **patients with primary CDI.** Principal component analysis (PCA) of annotated bile acid  
524 relative intensities for all included samples ( $n=273$ ), as coloured by time point of collection  
525 (A) or recurrence status (B). C) Average within-individual Euclidean distance of bile acid  
526 composition across timepoints for participants with more than one sample collected up to  
527 the first 9 days post-treatment ( $n= 45$ ; 12 recurrers and 33 non-recurrers).  $p$  value was  
528 calculated using Wilcoxon test.

529

530 **Figure 2: Longitudinal trajectories of fecal bile acids of primary CDI patients, comparing**  
531 **those experiencing recurrence versus those with no recurrence.** As measured across days  
532 to weeks following the end of initial antibiotic therapy. Longitudinal trajectories are  
533 demonstrated for A) deoxycholic acid (DCA) and B) lithocholic acid (LCA); thick lines  
534 correspond to the mean fit for recurrers and non-recurrers, while thinner lines are the fitted  
535 individual trajectories, from which area under curve (AUC) was calculated. Dots correspond  
536 to the  $\log_{10}$ -transformed and mean-centered BA relative quantification. C) AUC of subject-  
537 specific trajectories ordered by increasing median in recurrers.  $P$  values were obtained using  
538 a Wilcoxon test and were adjusted ( $P_{adj}$ ) using the Benjamini-Hochberg method. Only  
539 significant features ( $P_{adj} < 0.1$ ) are shown.

540

541 **Figure 3: Comparative temporal dynamics of stool BSH activity changes in patients with**  
542 **primary CDI experiencing recurrence versus those with no recurrence.** As assessed using  
543 plate-based precipitation assay. A) Time course of stool BSH activity. B) Comparison of stool  
544 BSH activity at one day post-treatment (left) and at the latest measured time point (right).  $P$   
545 values were generated using Wilcoxon test (recurrers:  $n=9$ ; non-recurrers:  $n=18$ ).

546

547 **Figure 4: The contribution of fecal bile acids to risk of recurrence in patients with primary**  
548 **CDI, and their use as a predictive tool of recurrence.** As assessed at early time points after  
549 completion of antibiotics as therapy for primary CDI. A) Bayesian joint longitudinal and  
550 survival model; a positive regression coefficient means that an increase in this particular bile  
551 acid will increase risk of recurrence, while a negative regression coefficient means that an  
552 increase in this bile acid will lower the risk of recurrence. CI denotes credibility interval.  
553 Longitudinal-survival model fitted to each bile acid was used to predict recurrence within 9  
554 days post-CDI treatment using measurements at B) three timepoints; C) two time points; D)  
555 one time point only. Predictions were made using 80% of the data as training set and the  
556 other 20% as test set. Receiver operating characteristic plots show the mean of 1,000 Monte  
557 Carlo permutations for each bile acid, and the mean AUROC value is indicated in parenthesis  
558 in the figure legend.

559

560

561

562

563

564

565

566

567

568

569

570

571

572

573

574

575

576

577

578

Main Manuscript

579

580

581 **Table 1:**

| <b>Variable Name</b>                                     | <b>n = 56</b> |
|----------------------------------------------------------|---------------|
| Age (Mean ± SD)                                          | 57.7 ± 16.3   |
| Male N,%                                                 | 36 (64.3%)    |
| Race N,%                                                 |               |
| Black                                                    | 9 (16%)       |
| White                                                    | 41 (73.2%)    |
| BMI (Mean ± SD)                                          | 28 ± 6.5      |
| Received Antibiotics prior to Diagnosis N,%              | 40 (71.4%)    |
| Prior PPI use N,%                                        | 27 (48.2%)    |
| History of Cirrhosis N,%                                 | 3 (5.3%)      |
| Dietary restrictions N,%                                 |               |
| No                                                       | 52 (92.8%)    |
| Vegan                                                    | 1 (1.7%)      |
| Vegetarian                                               | 2 (3.5%)      |
| Gluten Free                                              | 2 (3.5%)      |
| Lactose Free                                             | 1 (1.7%)      |
| Smoking status                                           |               |
| Never                                                    | 34 (60.7%)    |
| Former                                                   | 20 (35.7%)    |
| Current                                                  | 2 (3.6%)      |
| Diagnosis of Irritable Bowel Syndrome N,%                | 6 (10.7%)     |
| Baseline diarrhea or constipation N,%                    |               |
| No                                                       | 42 (75%)      |
| Diarrhea                                                 | 6 (10.7%)     |
| Constipation                                             | 6 (10.7%)     |
| Both                                                     | 2 (3.6%)      |
| Baseline Bristol Score (Mean ± SD)                       | 3.2 ± 1.3     |
| Ursodeoxycholic acid Use N,%                             | 0 (0.0%)      |
| Cholestyramine Use N,%                                   | 1 (1.7%)      |
| Colestipol Use N,%                                       | 1 (1.7%)      |
| CDI Treatment Regimen                                    |               |
| Metronidazole                                            | 14 (25%)      |
| Vancomycin                                               | 42 (75%)      |
| Other current antibiotics (not for <i>C. difficile</i> ) | 0 (0%)        |
| Test Used for Diagnosis N,%                              |               |
| PCR                                                      | 22 (39.2%)    |
| EIA Toxin                                                | 34 (60.7%)    |
| <b>Baseline Lab Values (Mean ± SD)</b>                   |               |
| WBC                                                      | 9.8 ± 5.3     |
| Hct                                                      | 36.1 ± 5.6    |
| Plts                                                     | 237.6 ± 103.6 |
| ALT                                                      | 44.4 ± 91.6   |
| AST                                                      | 41.3 ± 89.2   |
| Alkaline Phosphatase                                     | 81.9 ± 40.0   |
| T. Bilirubin                                             | 0.6 ± 0.4     |
| BUN                                                      | 20.3 ± 23.3   |
| Cr                                                       | 1.9 ± 5.2     |
| PT                                                       | 22.8 ± 29.4   |

Main Manuscript

|     |            |
|-----|------------|
| INR | 1.3 ± 0.31 |
|-----|------------|

582

583

584 **References:**

- 585 [1] Guh AY, Mu Y, Winston LG, Johnston H, Olson D, Farley MM, et al. Trends in U.S.  
586 Burden of *Clostridioides difficile* Infection and Outcomes. *N Engl J Med*  
587 2020;382:1320–30. <https://doi.org/10.1056/nejmoa1910215>.
- 588 [2] Eyre DW, Cule ML, Wilson DJ, Griffiths D, Vaughan A, O'Connor L, et al. Diverse  
589 Sources of *C. difficile* Infection Identified on Whole-Genome Sequencing. *N Engl J*  
590 *Med* 2013;369:1195–205. <https://doi.org/10.1056/nejmoa1216064>.
- 591 [3] Magill SS, Edwards JR, Bamberg W, Beldavs ZG, Dumyati G, Kainer MA, et al.  
592 Multistate Point-Prevalence Survey of Health Care–Associated Infections. *N Engl J*  
593 *Med* 2014;370:1198–208. <https://doi.org/10.1056/NEJMoa1306801>.
- 594 [4] Marra AR, Perencevich EN, Nelson RE, Samore M, Khader K, Chiang H-Y, et al.  
595 Incidence and Outcomes Associated With *Clostridium difficile* Infections: A Systematic  
596 Review and Meta-analysis. *JAMA Netw Open* 2020;3:e1917597–e1917597.  
597 <https://doi.org/10.1001/JAMANETWORKOPEN.2019.17597>.
- 598 [5] Feuerstadt P, Das R, Brandt LJ. The Evolution of Urban *C. difficile* Infection (CDI): CDI  
599 in 2009–2011 Is Less Severe and has Better Outcomes Than CDI in 2006–2008. *Am J*  
600 *Gastroenterol* 2014;109:1265–76. <https://doi.org/10.1038/ajg.2014.167>.
- 601 [6] Leffler DA, Lamont JT. *Clostridium difficile* Infection. *N Engl J Med* 2015;372:1539–48.  
602 <https://doi.org/10.1056/NEJMra1403772>.
- 603 [7] Cornely OA, Crook DW, Esposito R, Poirier A, Somero MS, Weiss K, et al. Fidaxomicin  
604 versus vancomycin for infection with *Clostridium difficile* in Europe, Canada, and the  
605 USA: A double-blind, non-inferiority, randomised controlled trial. *Lancet Infect Dis*  
606 2012;12:281–9. [https://doi.org/10.1016/S1473-3099\(11\)70374-7](https://doi.org/10.1016/S1473-3099(11)70374-7).
- 607 [8] Johnson S, Louie TJ, Gerding DN, Cornely OA, Chasan-Taber S, Fitts D, et al.  
608 Vancomycin, Metronidazole, or Tolevamer for *Clostridium difficile* Infection: Results  
609 From Two Multinational, Randomized, Controlled Trials. *Clin Infect Dis* 2014;59:345–  
610 54. <https://doi.org/10.1093/cid/ciu313>.
- 611 [9] Johnson S, Lavergne V, Skinner AM, Gonzales-Luna AJ, Garey KW, Kelly CP, et al.  
612 Clinical Practice Guideline by the Infectious Diseases Society of America (IDSA) and

*Main Manuscript*

- 613 Society for Healthcare Epidemiology of America (SHEA): 2021 Focused Update  
614 Guidelines on Management of Clostridioides difficile Infection in Adults. Clin Infect Dis  
615 2021;73:e1029–44. <https://doi.org/10.1093/cid/ciab549>.
- 616 [10] Kelly CR, Fischer M, Allegretti JR, LaPlante K, Stewart DB, Limketkai BN, et al. ACG  
617 Clinical Guidelines: Prevention, Diagnosis, and Treatment of Clostridioides difficile  
618 Infections. Am J Gastroenterol 2021;116:1124–47.  
619 <https://doi.org/10.14309/ajg.0000000000001278>.
- 620 [11] Cobo J, Merino E, Martínez C, Cózar-Llistó A, Shaw E, Marrodán T, et al. Prediction of  
621 recurrent clostridium difficile infection at the bedside: the GEIH-CDI score. Int J  
622 Antimicrob Agents 2018;51:393–8.  
623 <https://doi.org/10.1016/j.ijantimicag.2017.09.010>.
- 624 [12] D’Agostino RB, Collins SH, Pencina KM, Kean Y, Gorbach S. Risk estimation for  
625 recurrent clostridium difficile infection based on clinical factors. Clin Infect Dis  
626 2014;58:1386–93. <https://doi.org/10.1093/cid/ciu107>.
- 627 [13] Mullish BH, Allegretti JR. The contribution of bile acid metabolism to the  
628 pathogenesis of Clostridioides difficile infection. Therap Adv Gastroenterol 2021;14.  
629 <https://doi.org/10.1177/17562848211017725>.
- 630 [14] Martin JSH, Monaghan TM, Wilcox MH. Clostridium difficile infection: Epidemiology,  
631 diagnosis and understanding transmission. Nat Rev Gastroenterol Hepatol  
632 2016;13:206–16. <https://doi.org/10.1038/nrgastro.2016.25>.
- 633 [15] Allegretti JR, Kearney S, Li N, Bogart E, Bullock K, Gerber GK, et al. Recurrent  
634 Clostridium difficile infection associates with distinct bile acid and microbiome  
635 profiles. Aliment Pharmacol Ther 2016;43:1142–53.  
636 <https://doi.org/10.1111/apt.13616>.
- 637 [16] Buffie CG, Bucci V, Stein RR, McKenney PT, Ling L, Gouberne A, et al. Precision  
638 microbiome reconstitution restores bile acid mediated resistance to Clostridium  
639 difficile. Nature 2014;517:205–8. <https://doi.org/10.1038/nature13828>.
- 640 [17] Studer N, Desharnais L, Beutler M, Brugiroux S, Terrazos MA, Menin L, et al.  
641 Functional Intestinal Bile Acid 7 $\alpha$ -Dehydroxylation by Clostridium scindens Associated  
642 with Protection from Clostridium difficile Infection in a Gnotobiotic Mouse Model.  
643 Front Cell Infect Microbiol 2016;6:191. <https://doi.org/10.3389/fcimb.2016.00191>.
- 644 [18] Mullish BH, McDonald JAK, Pechlivanis A, Allegretti JR, Kao D, Barker GF, et al.

*Main Manuscript*

- 645 Microbial bile salt hydrolases mediate the efficacy of faecal microbiota transplant in  
646 the treatment of recurrent *Clostridioides difficile* infection. *Gut* 2019;68:1791–800.  
647 <https://doi.org/10.1136/gutjnl-2018-317842>.
- 648 [19] Sorg JA, Sonenshein AL. Bile Salts and Glycine as Cogerminants for *Clostridium difficile*  
649 Spores. *J Bacteriol* 2008;190:2505–12. <https://doi.org/10.1128/JB.01765-07>.
- 650 [20] Thanissery R, Winston JA, Theriot CM. Inhibition of spore germination, growth, and  
651 toxin activity of clinically relevant *C. difficile* strains by gut microbiota derived  
652 secondary bile acids. *Anaerobe* 2017;45:86–100.  
653 <https://doi.org/10.1016/j.anaerobe.2017.03.004>.
- 654 [21] Tam J, Icho S, Utama E, Orrell KE, Gómez-Biagi RF, Theriot CM, et al. Intestinal bile  
655 acids directly modulate the structure and function of *C. difficile* TcdB toxin. *Proc Natl*  
656 *Acad Sci U S A* 2020;117:6792–800. <https://doi.org/10.1073/pnas.1916965117>.
- 657 [22] Song X, Sun X, Oh SF, Wu M, Zhang Y, Zheng W, et al. Microbial bile acid metabolites  
658 modulate gut ROR $\gamma$ + regulatory T cell homeostasis. *Nat* 2019 5777790 2019;577:410–  
659 5. <https://doi.org/10.1038/s41586-019-1865-0>.
- 660 [23] Monaghan T, Mullish BH, Patterson J, Wong GKSK, Marchesi JR, Xu H, et al. Effective  
661 fecal microbiota transplantation for recurrent *Clostridioides difficile* infection in  
662 humans is associated with increased signalling in the bile acid-farnesoid X receptor-  
663 fibroblast growth factor pathway. *Gut Microbes* 2019;10:1–7.  
664 <https://doi.org/10.1080/19490976.2018.1506667>.
- 665 [24] Robinson JI, Weir WH, Crowley JR, Hink T, Reske KA, Kwon JH, et al. Metabolomic  
666 networks connect host-microbiome processes to human *Clostridioides difficile*  
667 infections. *J Clin Invest* 2019;129:3792–806. <https://doi.org/10.1172/JCI126905>.
- 668 [25] Allegretti JR, Marcus J, Storm M, Sitko J, Kennedy K, Gerber GK, et al. Clinical  
669 Predictors of Recurrence After Primary *Clostridioides difficile* Infection: A Prospective  
670 Cohort Study. *Dig Dis Sci* 2020;65:1761–6. [https://doi.org/10.1007/s10620-019-](https://doi.org/10.1007/s10620-019-05900-3)  
671 [05900-3](https://doi.org/10.1007/s10620-019-05900-3).
- 672 [26] Mullish BH, Pechlivanis A, Barker GF, Thursz MR, Marchesi JR, McDonald JAK.  
673 Functional microbiomics: Evaluation of gut microbiota-bile acid metabolism  
674 interactions in health and disease. *Methods* 2018;149:49–58.  
675 <https://doi.org/10.1016/j.ymeth.2018.04.028>.
- 676 [27] Sarafian MH, Lewis MR, Pechlivanis A, Ralphs S, McPhail MJW, Patel VC, et al. Bile

*Main Manuscript*

- 677 Acid Profiling and Quantification in Biofluids Using Ultra-Performance Liquid  
678 Chromatography Tandem Mass Spectrometry. *Anal Chem* 2015;87:9662–70.  
679 <https://doi.org/10.1021/acs.analchem.5b01556>.
- 680 [28] Sands CJ, Gómez-Romero M, Correia G, Chekmeneva E, Camuzeaux S, Izzi-Engbeaya  
681 C, et al. Representing the Metabolome with High Fidelity: Range and Response as  
682 Quality Control Factors in LC-MS-Based Global Profiling. *Anal Chem* 2021;93:1924–33.  
683 [https://doi.org/10.1021/ACS.ANALCHEM.0C03848/ASSET/IMAGES/LARGE/AC0C03848\\_0005.JPEG](https://doi.org/10.1021/ACS.ANALCHEM.0C03848/ASSET/IMAGES/LARGE/AC0C03848_0005.JPEG).
- 684  
685 [29] Chambers MC, MacLean B, Burke R, Amodei D, Ruderman DL, Neumann S, et al. A  
686 cross-platform toolkit for mass spectrometry and proteomics. *Nat Biotechnol*  
687 2012;30:918–20. <https://doi.org/10.1038/nbt.2377>.
- 688 [30] Wolfer AM, D S Correia G, Sands CJ, Camuzeaux S, Yuen AHY, Chekmeneva E, et al.  
689 peakPanther, an R package for large-scale targeted extraction and integration of  
690 annotated metabolic features in LC–MS profiling datasets. *Bioinformatics* 2021.  
691 <https://doi.org/10.1093/BIOINFORMATICS/BTAB433>.
- 692 [31] Dunn WB, Broadhurst D, Begley P, Zelena E, Francis-Mcintyre S, Anderson N, et al.  
693 Procedures for large-scale metabolic profiling of serum and plasma using gas  
694 chromatography and liquid chromatography coupled to mass spectrometry. *Nat*  
695 *Protoc* 2011 67 2011;6:1060–83. <https://doi.org/10.1038/nprot.2011.335>.
- 696 [32] Sands CJ, Wolfer AM, Correia GDS, Sadawi N, Ahmed A, Jiménez B, et al. The nPYc-  
697 Toolbox, a Python module for the pre-processing, quality-control and analysis of  
698 metabolic profiling datasets. *Bioinformatics* 2019;35:5359–60.  
699 <https://doi.org/10.1093/BIOINFORMATICS/BTZ566>.
- 700 [33] Thévenot EA, Roux A, Xu Y, Ezan E, Junot C. Analysis of the Human Adult Urinary  
701 Metabolome Variations with Age, Body Mass Index, and Gender by Implementing a  
702 Comprehensive Workflow for Univariate and OPLS Statistical Analyses. *J Proteome*  
703 *Res* 2015;14:3322–35.
- 704 [34] Rizopoulos D. The R Package JMbayes for Fitting Joint Models for Longitudinal and  
705 Time-to-Event Data Using MCMC. *J Stat Softw* 2016;72:1–46.  
706 <https://doi.org/10.18637/JSS.V072.I07>.
- 707 [35] Jones B V, Begley M, Hill C, Gahan CGM, Marchesi JR. Functional and comparative  
708 metagenomic analysis of bile salt hydrolase activity in the human gut microbiome.



Main Manuscript

- 709 Proc Natl Acad Sci U S A 2008;105:13580–5.  
710 <https://doi.org/10.1073/pnas.0804437105>.
- 711 [36] Vrieze A, Out C, Fuentes S, Jonker L, Reuling I, Kootte RS, et al. Impact of oral  
712 vancomycin on gut microbiota, bile acid metabolism, and insulin sensitivity. *J Hepatol*  
713 2014;60:824–31. <https://doi.org/10.1016/J.JHEP.2013.11.034>.
- 714 [37] Reijnders D, Goossens GH, Hermes GDA, Zoetendal EG, Dejong CHC, Blaak  
715 Correspondence EE, et al. Clinical and Translational Report Effects of Gut Microbiota  
716 Manipulation by Antibiotics on Host Metabolism in Obese Humans: A Randomized  
717 Double-Blind Placebo-Controlled Trial *Cell Metabolism Clinical and Translational*  
718 *Report Effects of Gut Microbiota Mani. Cell Metab* 2016;24:63–74.  
719 <https://doi.org/10.1016/j.cmet.2016.06.016>.
- 720 [38] Foley MH, Walker ME, Stewart AK, O’Flaherty S, Gentry EC, Allen G, et al. Distinct bile  
721 salt hydrolase substrate preferences dictate *C. difficile* pathogenesis. *BioRxiv*  
722 2022:2022.03.24.485529. <https://doi.org/10.1101/2022.03.24.485529>.
- 723 [39] Weingarden AR, Dosa PI, DeWinter E, Steer CJ, Shaughnessy MK, Johnson JR, et al.  
724 Changes in Colonic Bile Acid Composition following Fecal Microbiota Transplantation  
725 Are Sufficient to Control *Clostridium difficile* Germination and Growth. *PLoS One*  
726 2016;11:e0147210. <https://doi.org/10.1371/journal.pone.0147210>.
- 727 [40] Weingarden AR, Chen C, Bobr A, Yao D, Lu Y, Nelson VM, et al. Microbiota  
728 transplantation restores normal fecal bile acid composition in recurrent *Clostridium*  
729 *difficile* infection. *Am J Physiol Liver Physiol* 2014;306:G310–9.  
730 <https://doi.org/10.1152/ajpgi.00282.2013>.
- 731 [41] Feuerstadt P, Louie TJ, Lashner B, Wang EEL, Diao L, Bryant JA, et al. SER-109, an Oral  
732 Microbiome Therapy for Recurrent *Clostridioides difficile* Infection. *N Engl J Med*  
733 2022;386:220–9. <https://doi.org/10.1056/nejmoa2106516>.
- 734 [42] Dsouza M, Menon R, Crossette E, Bhattarai SK, Schneider J, Kim Y-G, et al.  
735 Colonization of the live biotherapeutic product VE303 and modulation of the  
736 microbiota and metabolites in healthy volunteers. *Cell Host Microbe* 2022;30:583-  
737 598.e8. <https://doi.org/10.1016/J.CHOM.2022.03.016>.
- 738 [43] Guzior D V., Quinn RA. Review: microbial transformations of human bile acids.  
739 *Microbiome* 2021;9:1–13. <https://doi.org/10.1186/S40168-021-01101-1/FIGURES/5>.
- 740 [44] Devlin AS, Fischbach MA. A biosynthetic pathway for a prominent class of microbiota-

*Main Manuscript*

- 741 derived bile acids. *Nat Chem Biol* 2015 119 2015;11:685–90.
- 742 <https://doi.org/10.1038/nchembio.1864>.
- 743 [45] Ridlon JM, Kang D-J, Hylemon PB. Bile salt biotransformations by human intestinal  
744 bacteria. *J Lipid Res* 2006;47:241–59. <https://doi.org/10.1194/jlr.R500013-JLR200>.
- 745 [46] Sato Y, Atarashi K, Plichta DR, Arai Y, Sasajima S, Kearney SM, et al. Novel bile acid  
746 biosynthetic pathways are enriched in the microbiome of centenarians. *Nature*  
747 2021;599:458–64. <https://doi.org/10.1038/s41586-021-03832-5>.
- 748 [47] Paik D, Yao L, Zhang Y, Bae S, D’Agostino GD, Zhang M, et al. Human gut bacteria  
749 produce TH17-modulating bile acid metabolites. *Nat* 2022 2022:1–6.  
750 <https://doi.org/10.1038/s41586-022-04480-z>.
- 751 [48] Winston JA, Rivera AJ, Cai J, Thanissery R, Montgomery SA, Patterson AD, et al.  
752 Ursodeoxycholic acid (udca) mitigates the host inflammatory response during  
753 *Clostridioides difficile* infection by altering gut bile acids. *Infect Immun* 2020;88.  
754 <https://doi.org/10.1128/IAI.00045-20>.
- 755 [49] Doden HL, Ridlon JM. Microbial Hydroxysteroid Dehydrogenases: From Alpha to  
756 Omega. *Microorg* 2021, Vol 9, Page 469 2021;9:469.  
757 <https://doi.org/10.3390/MICROORGANISMS9030469>.
- 758 [50] Farowski F, Solbach P, Tsakmaklis A, Brodesser S, Cruz Aguilar MR, Cornely OA, et al.  
759 Potential biomarkers to predict outcome of faecal microbiota transfer for recurrent  
760 *Clostridioides difficile* infection. *Dig Liver Dis* 2019;51:944–51.  
761 <https://doi.org/10.1016/j.dld.2019.01.012>.
- 762 [51] Khanna S, Montassier E, Schmidt B, Patel R, Knights D, Pardi DS, et al. Gut microbiome  
763 predictors of treatment response and recurrence in primary *Clostridium difficile*  
764 infection. *Aliment Pharmacol Ther* 2016;44:715–27.  
765 <https://doi.org/10.1111/apt.13750>.
- 766 [52] Shiffka SJ, Kane MA, Swaan PW. Planar bile acids in health and disease. *Biochim*  
767 *Biophys Acta - Biomembr* 2017;1859:2269–76.  
768 <https://doi.org/10.1016/j.bbamem.2017.08.019>.
- 769



**A**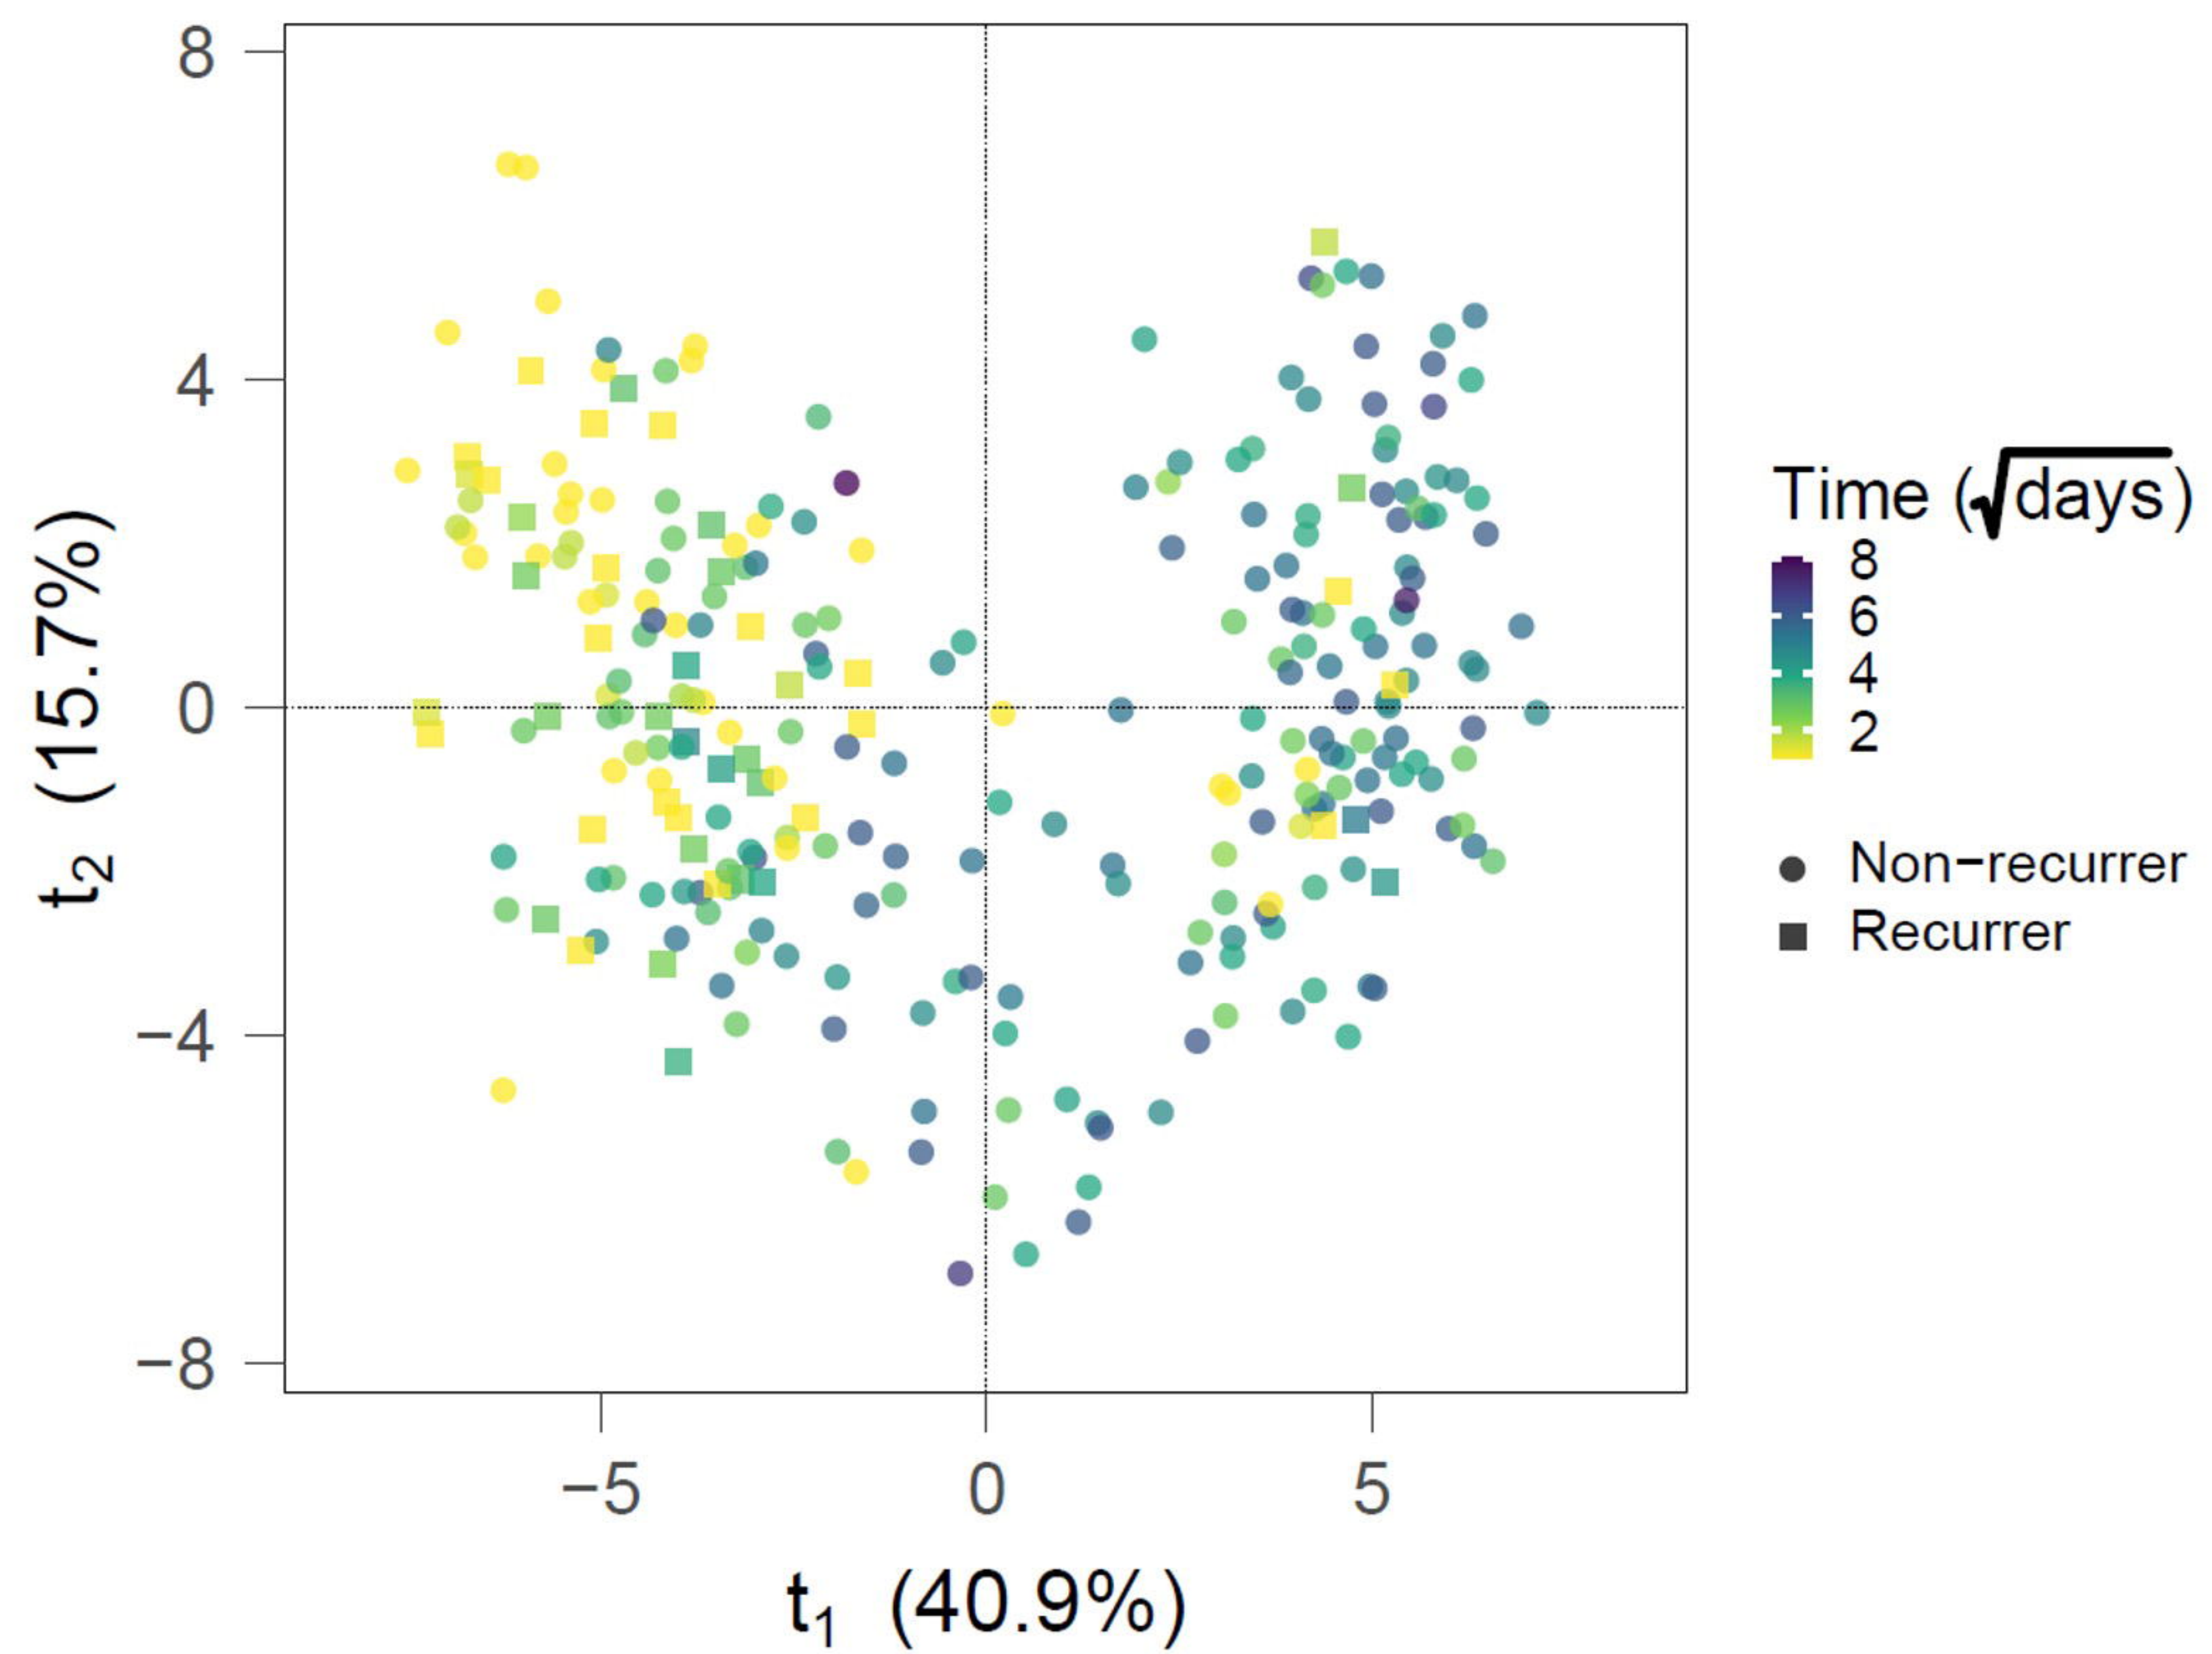**B**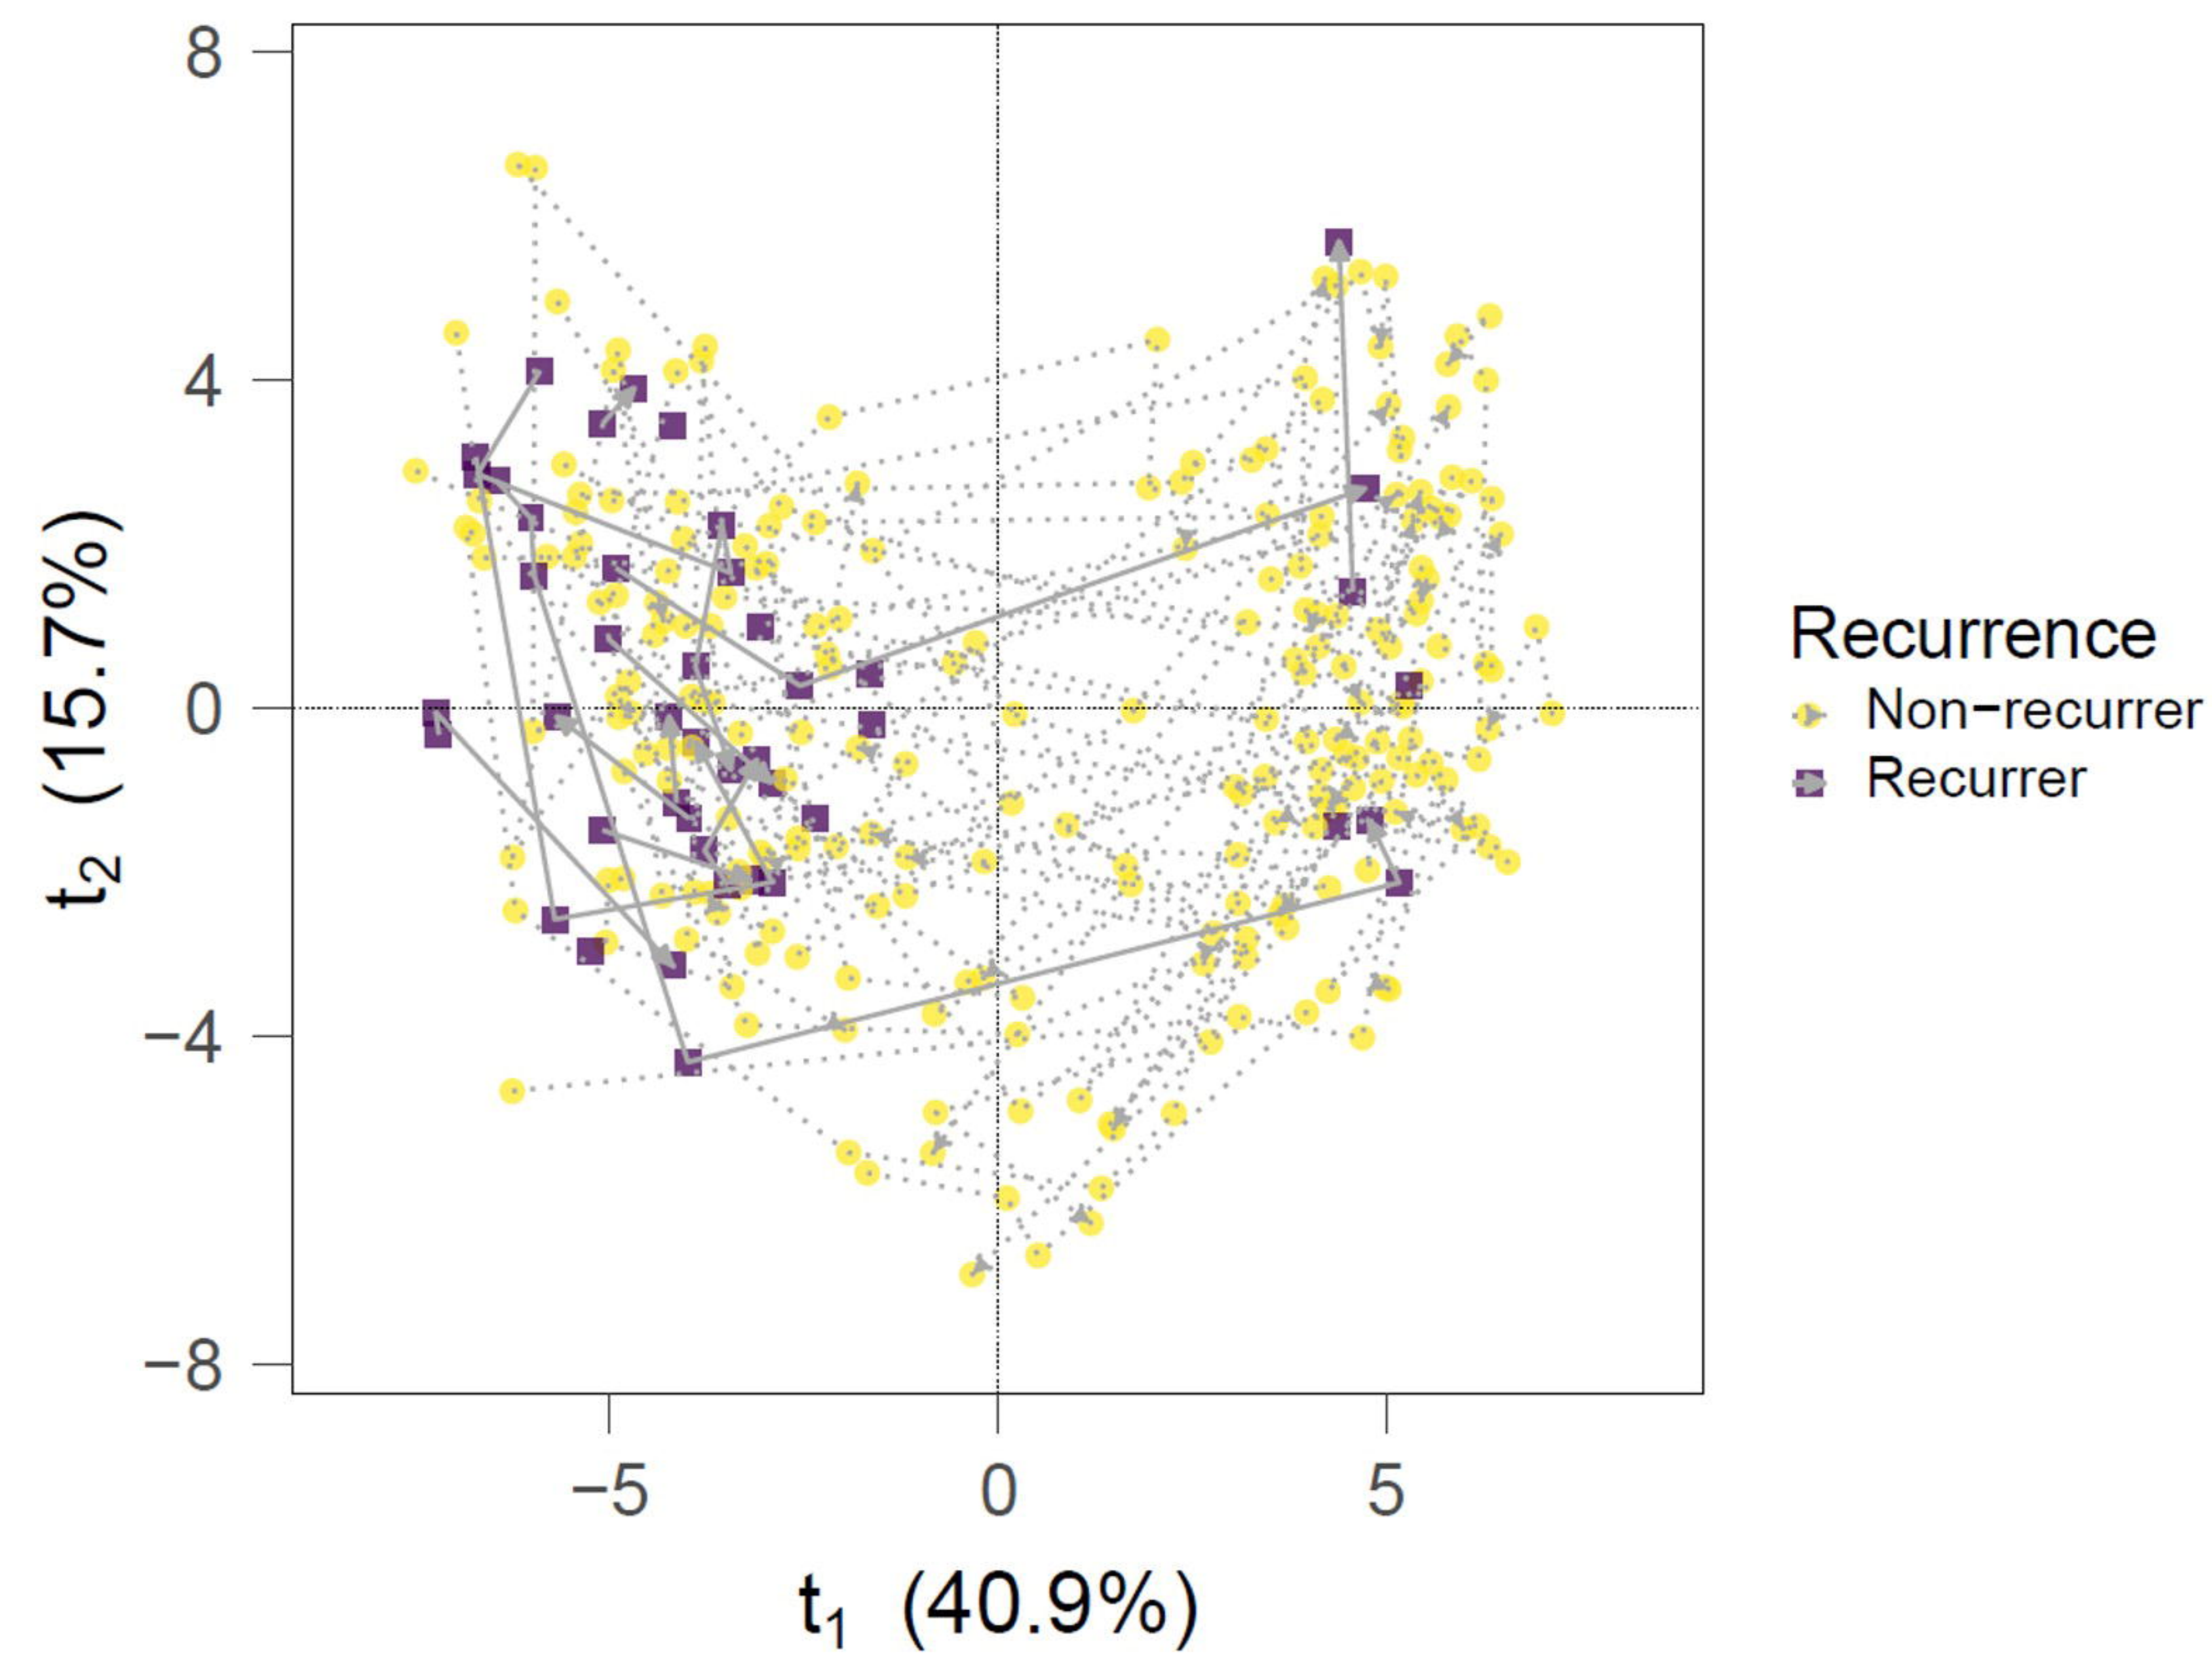**C**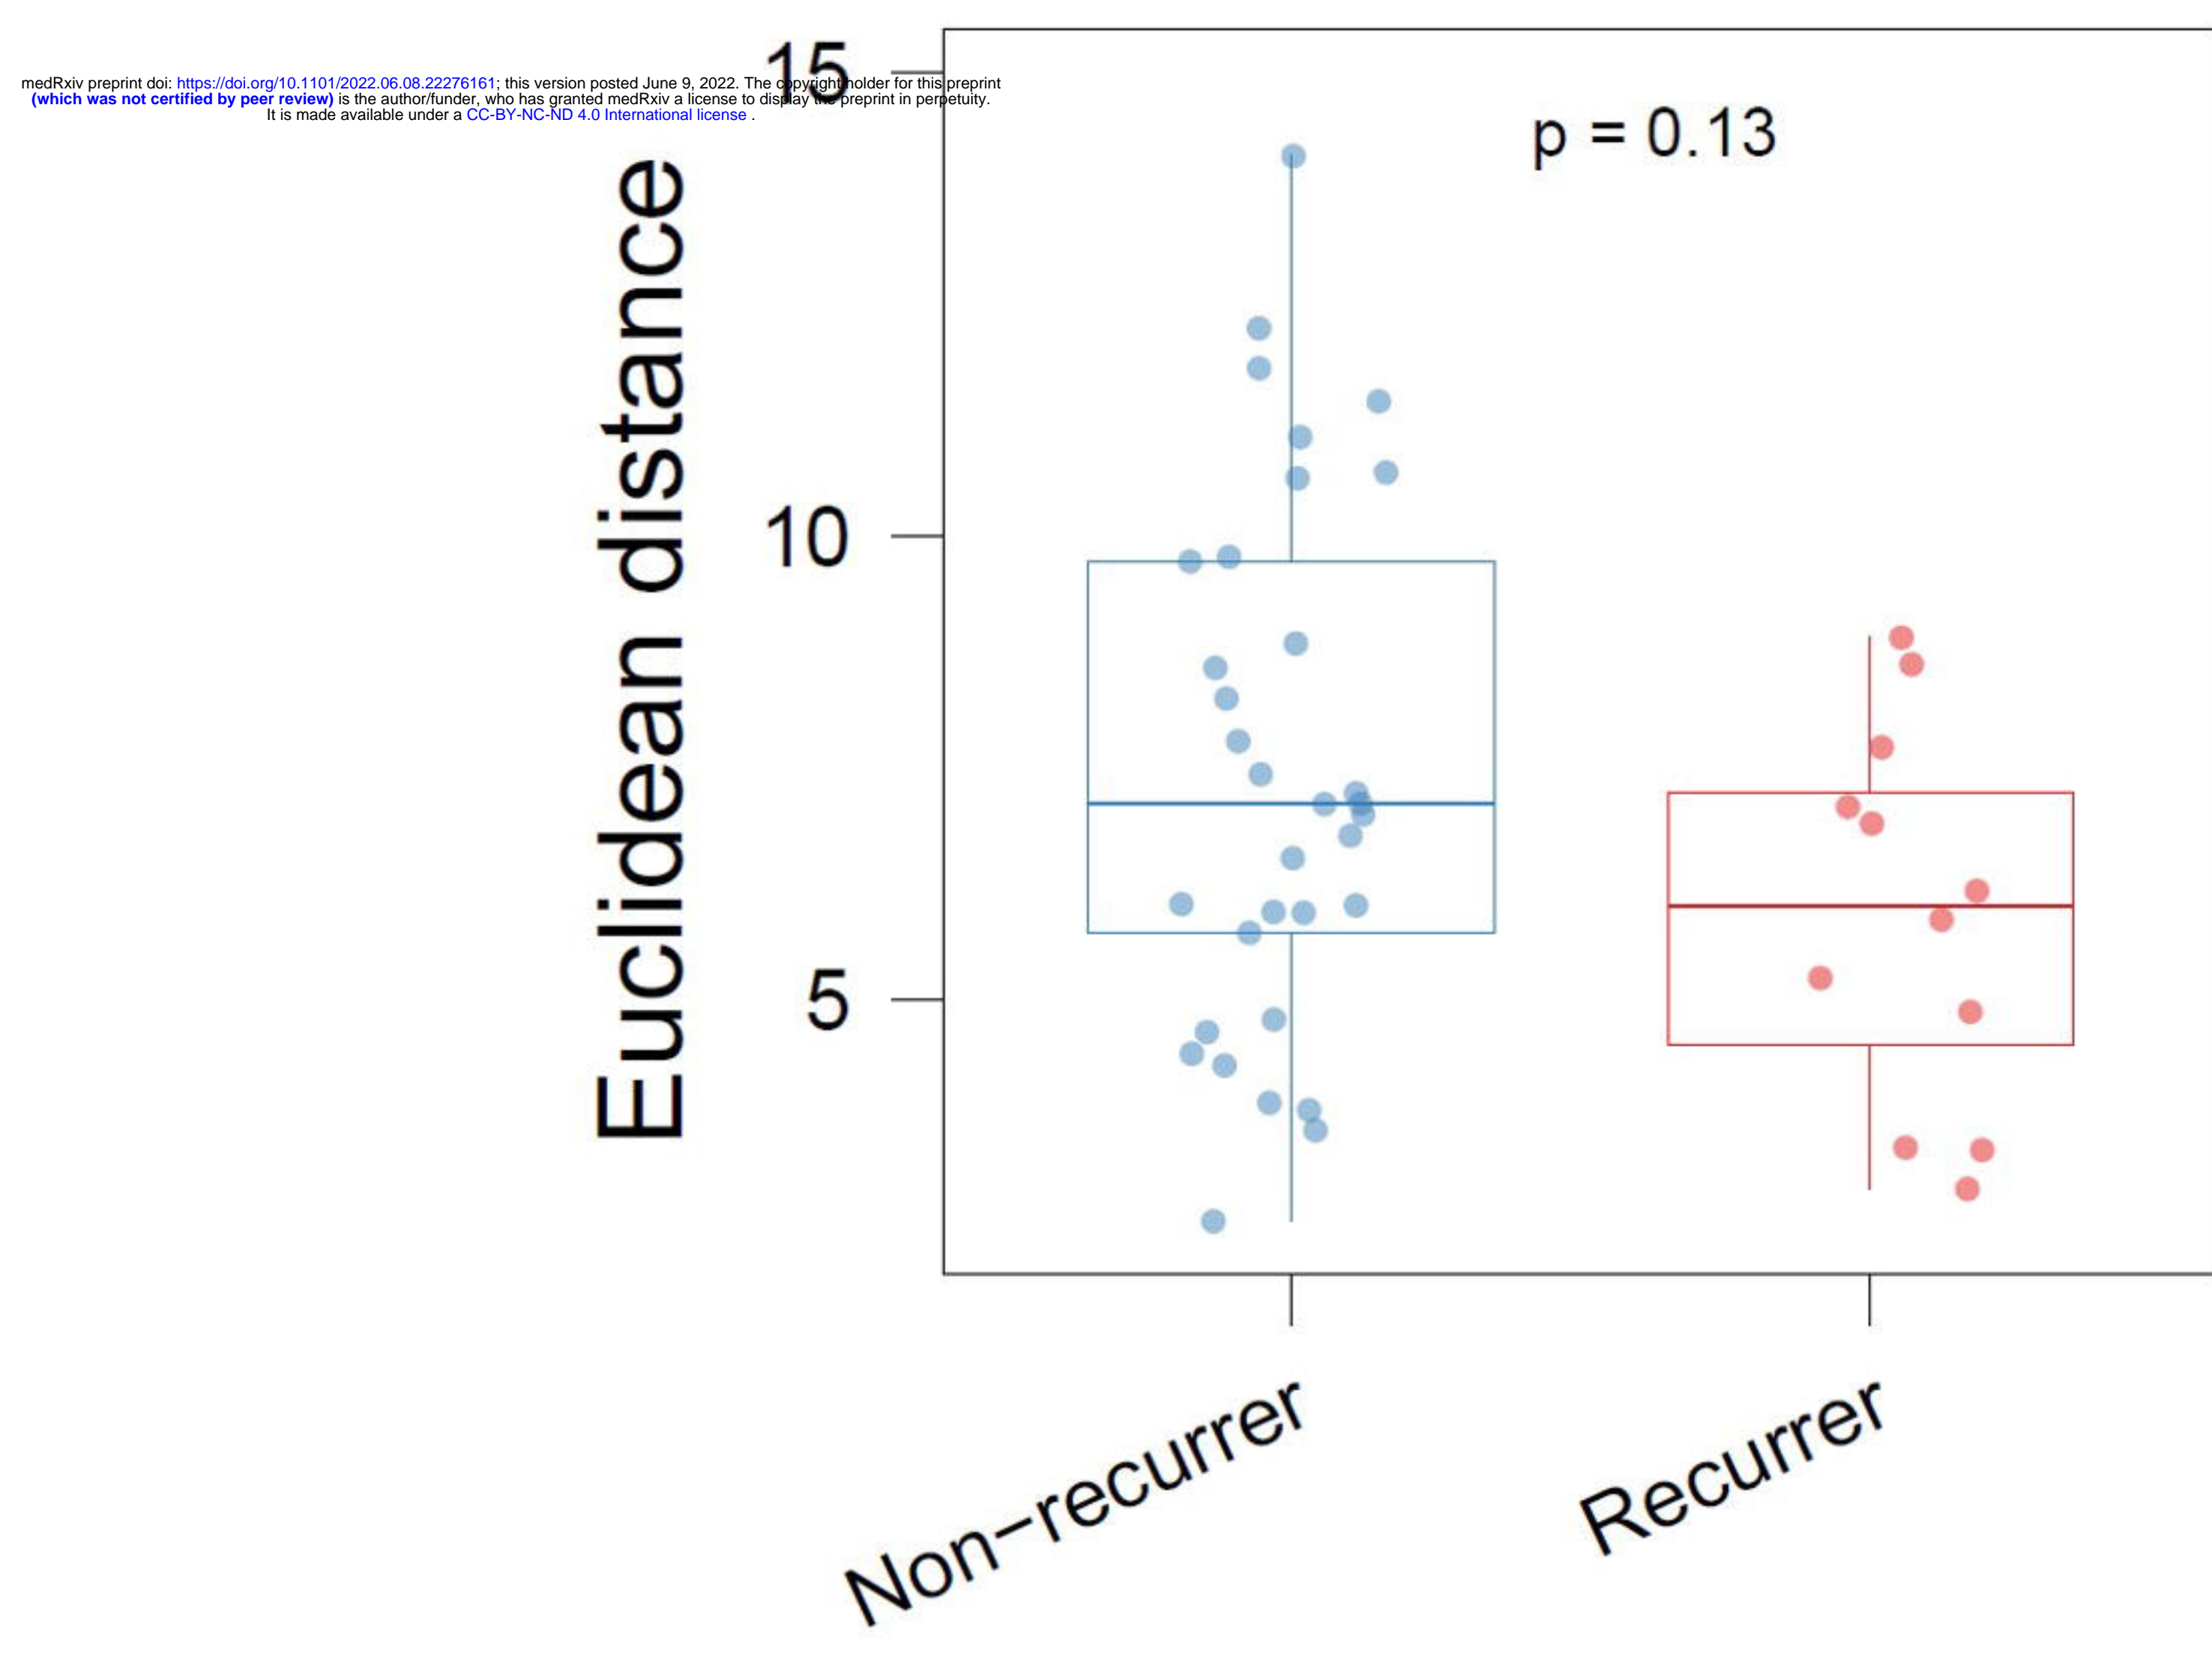



**A**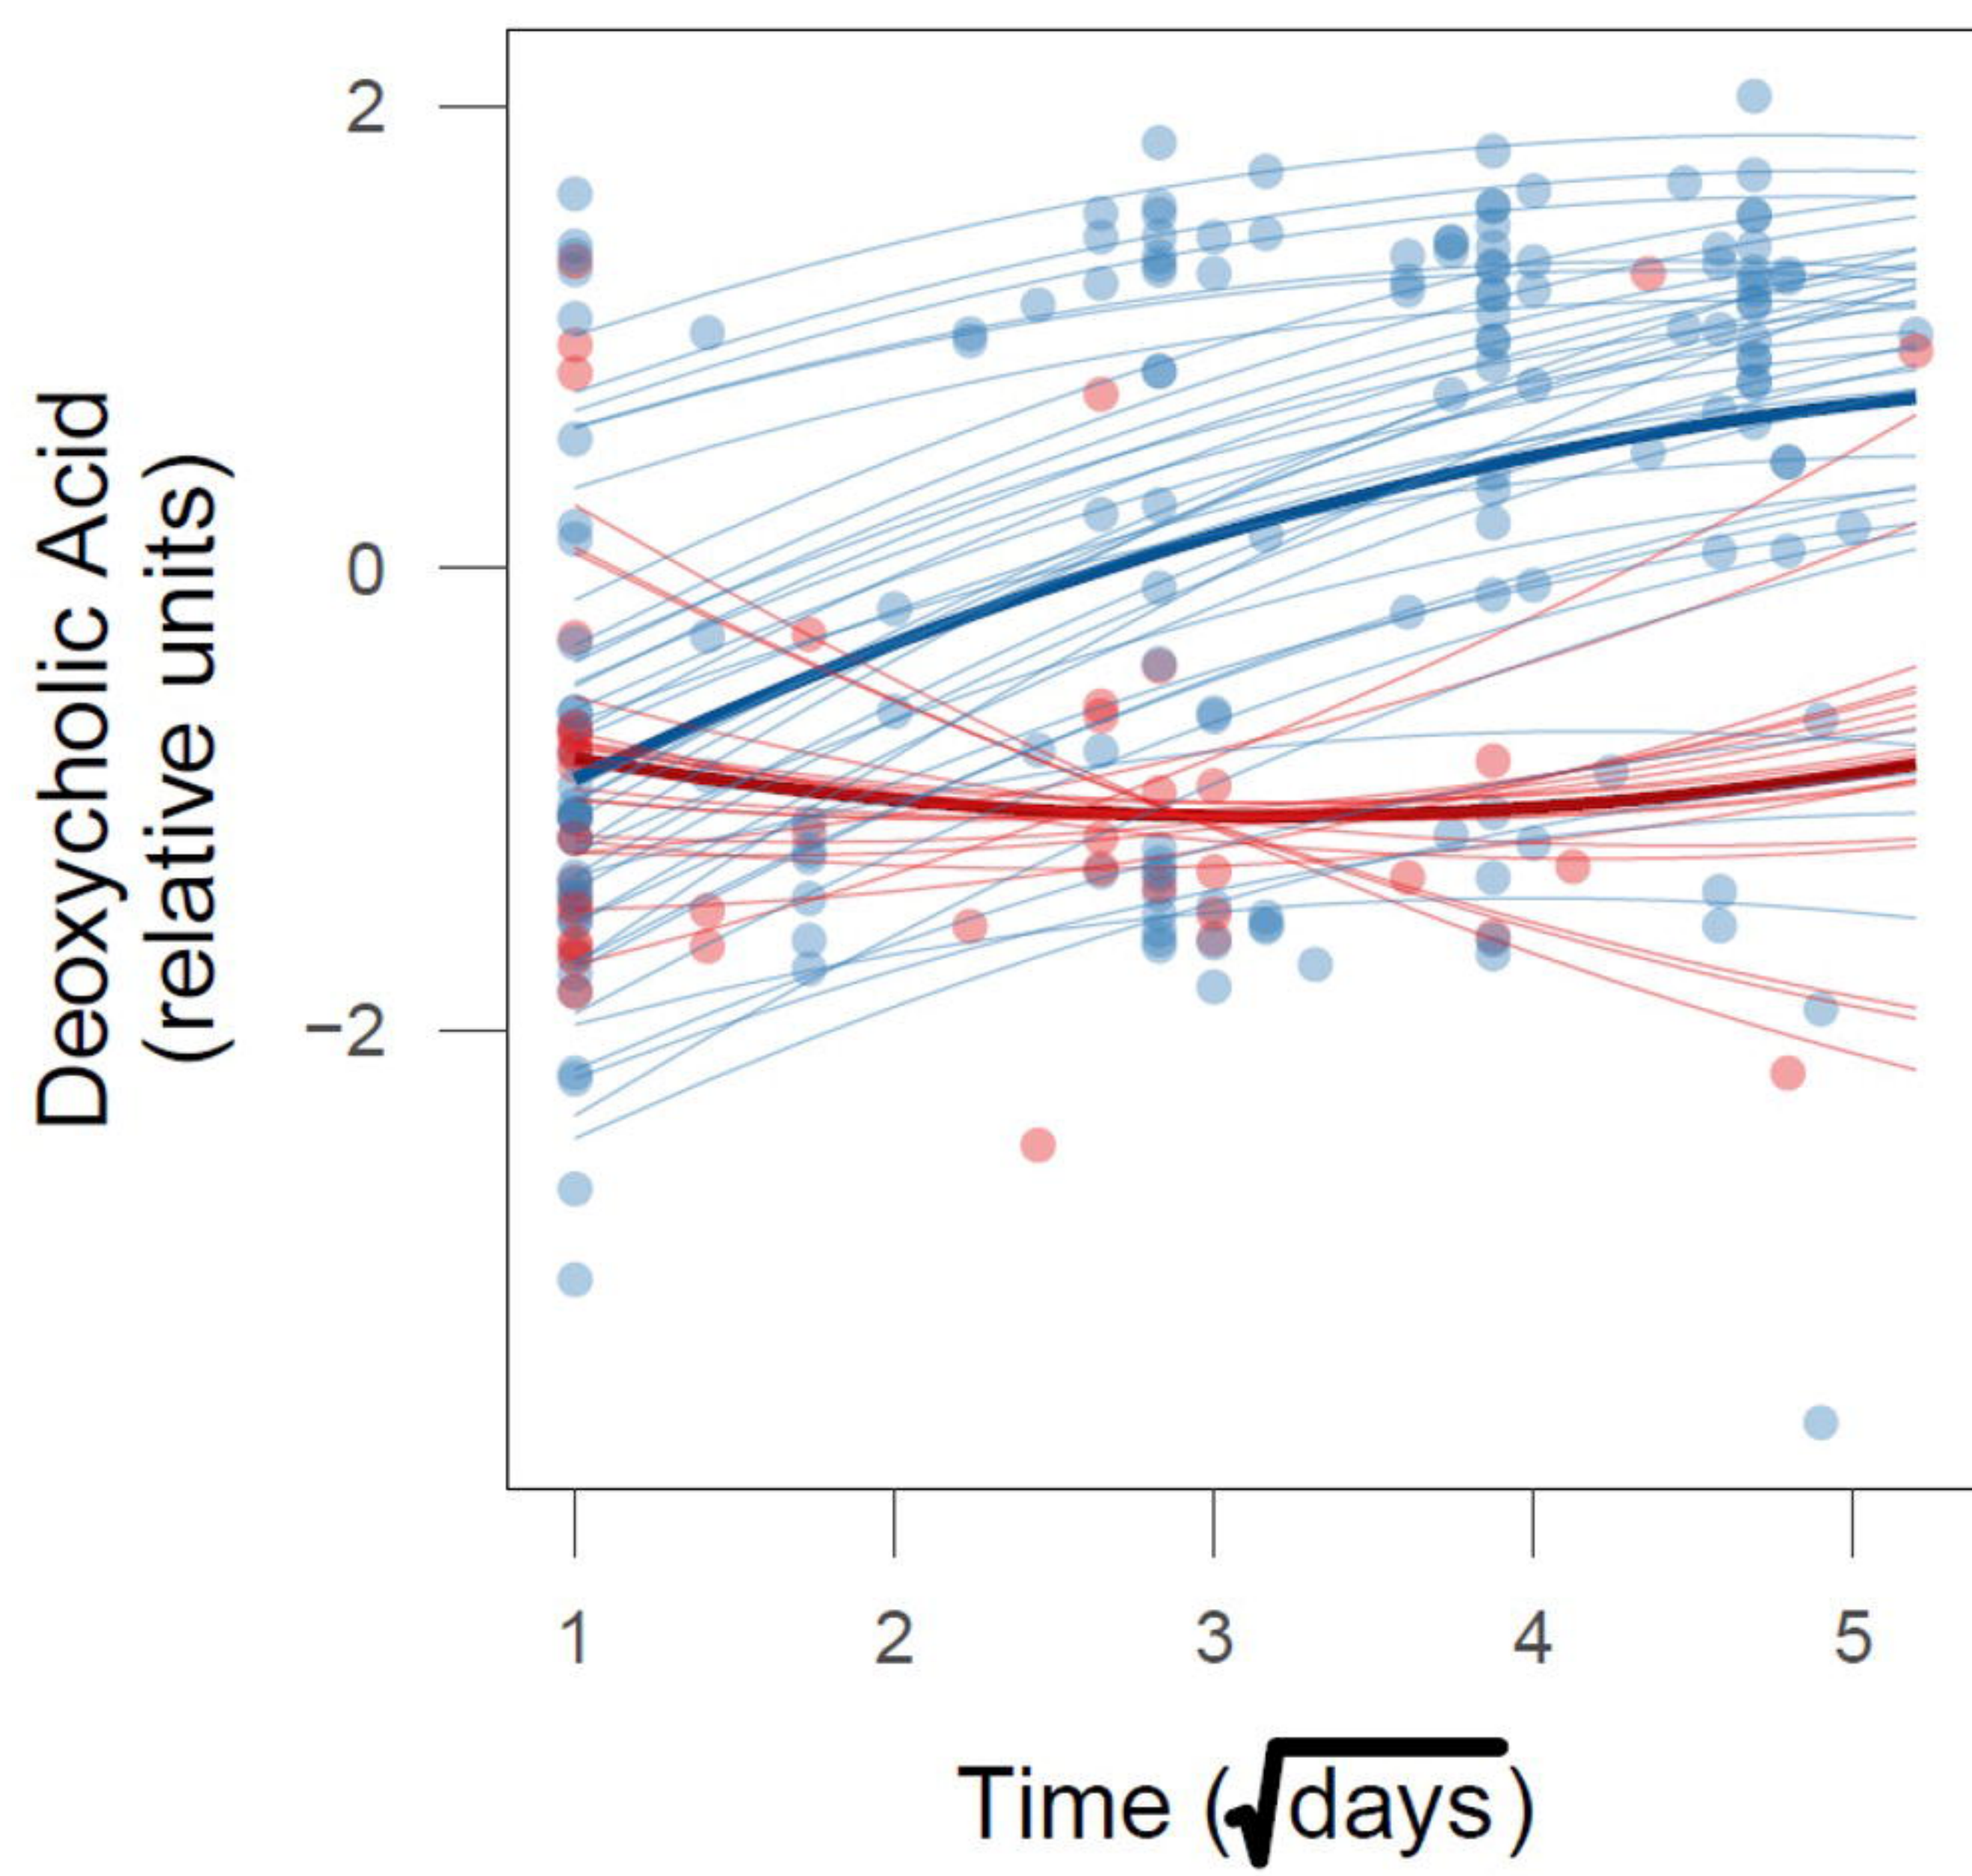**B**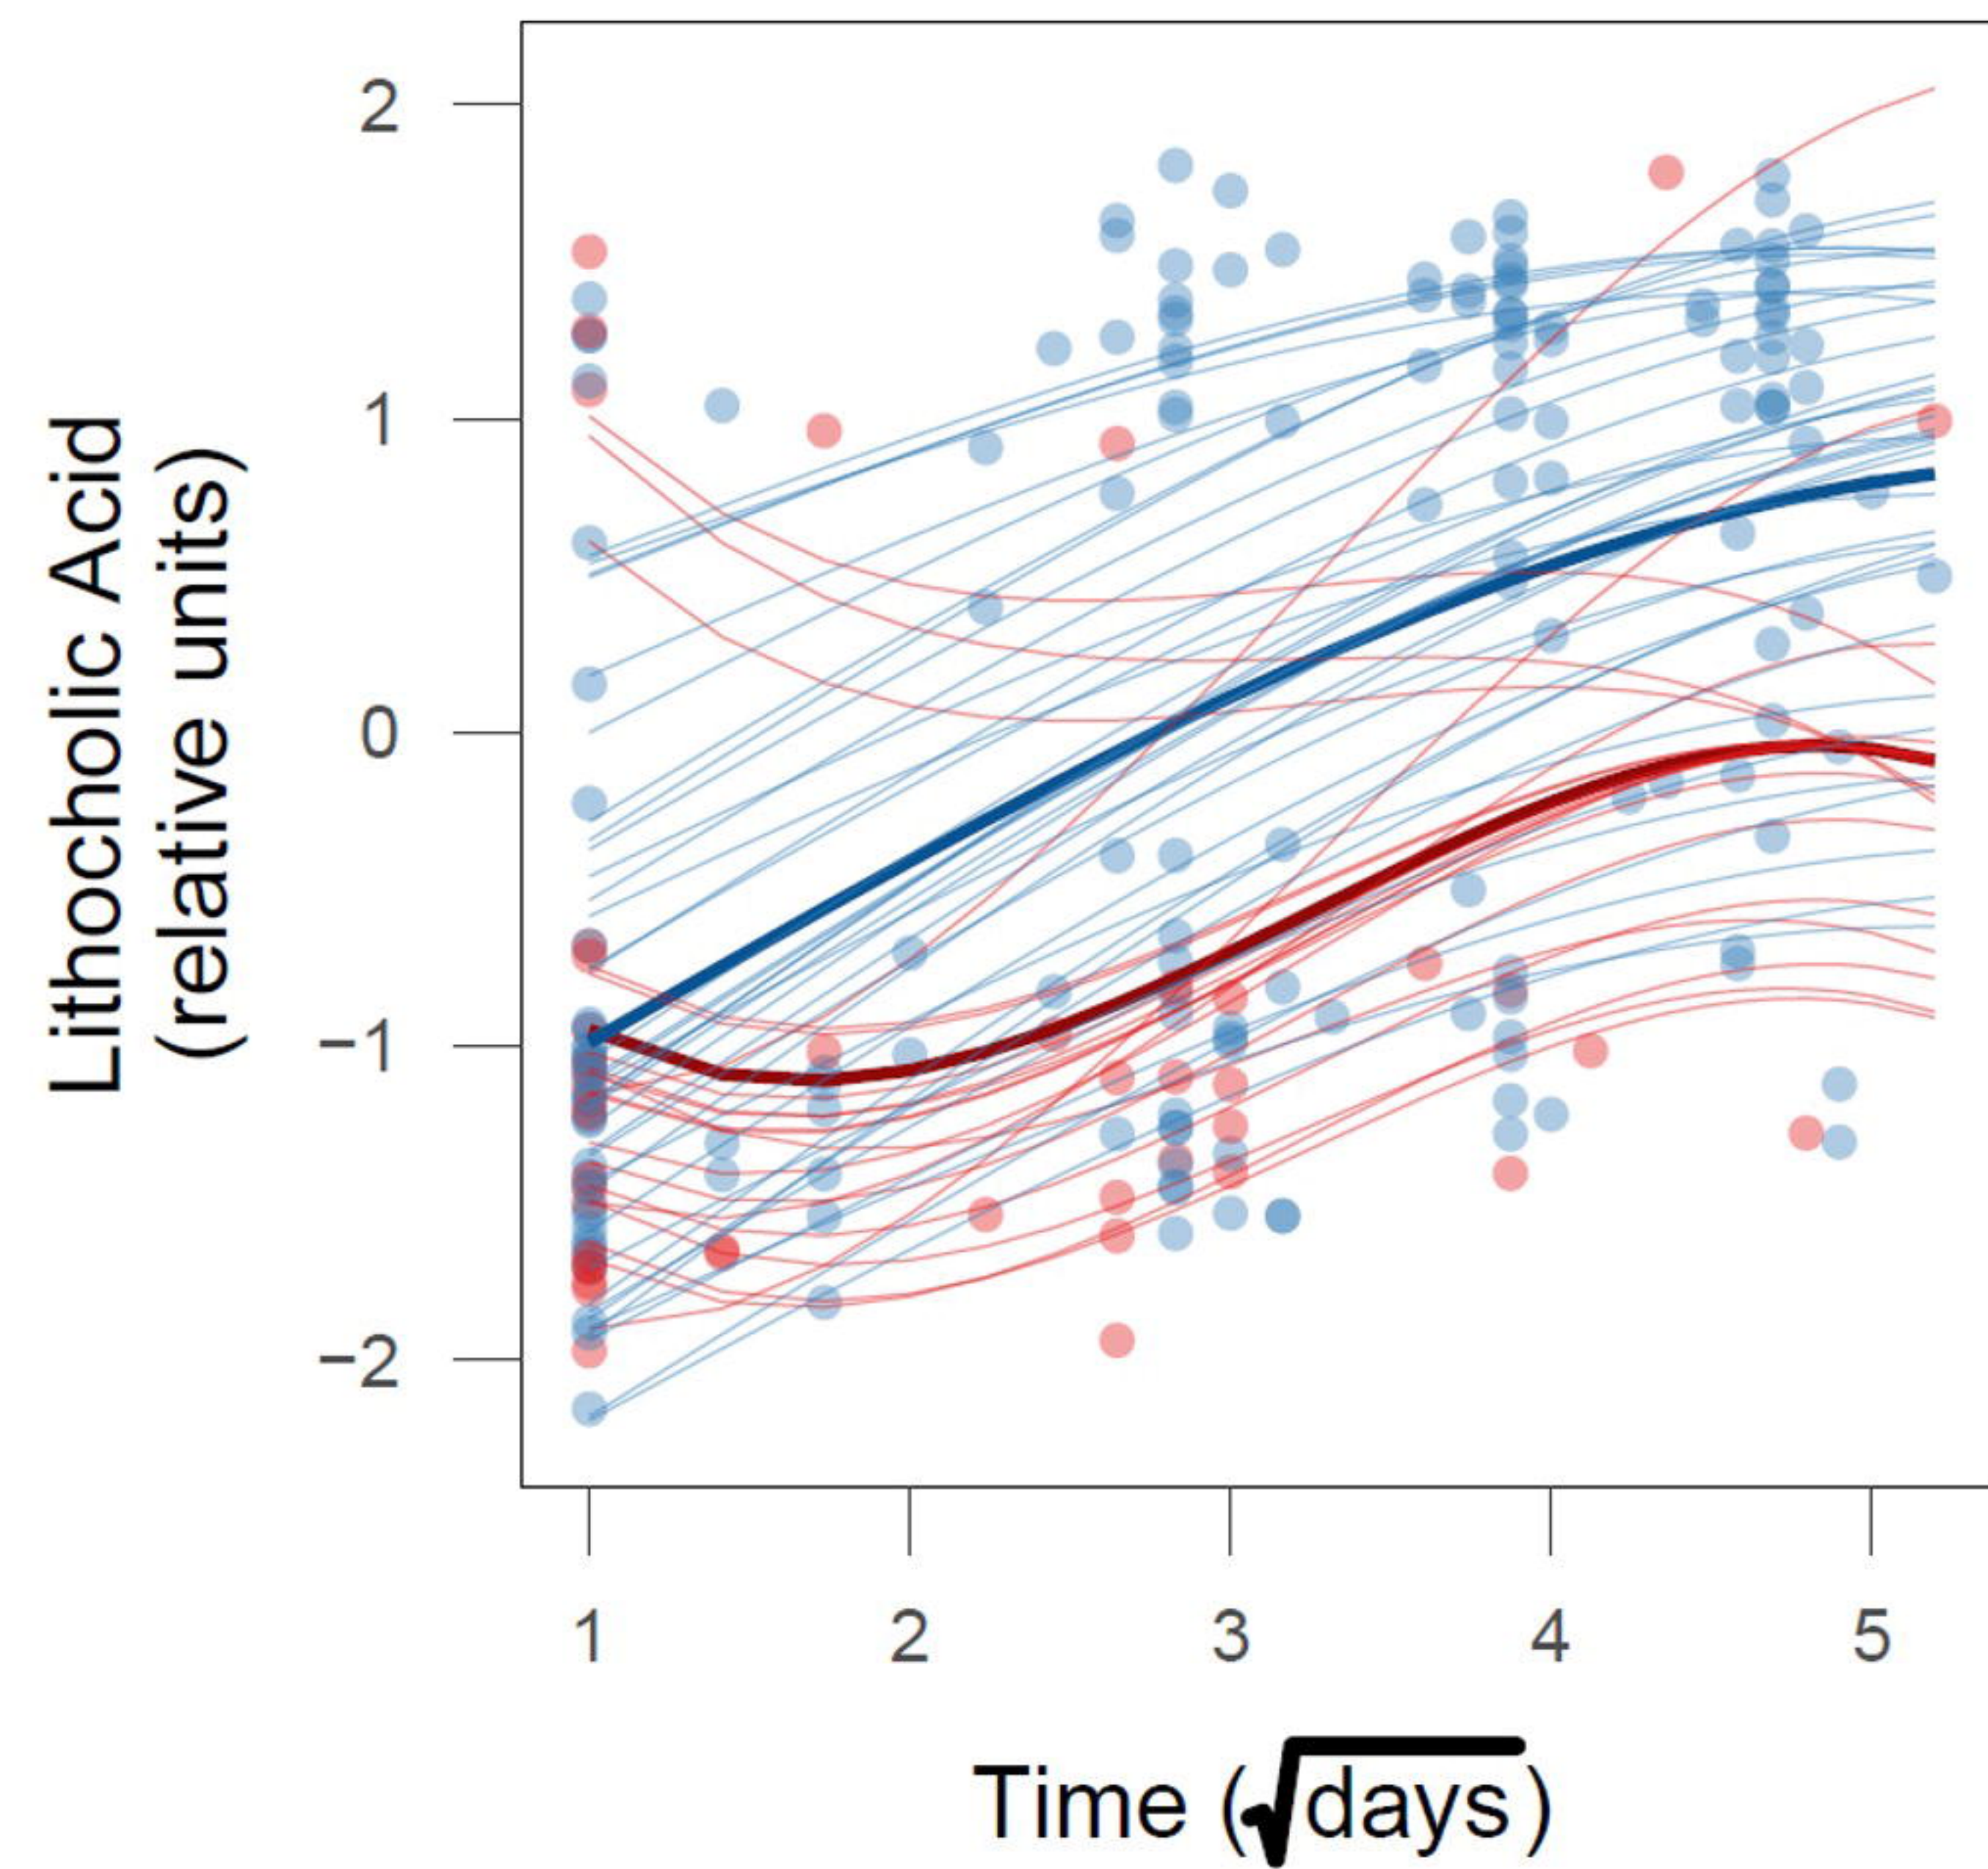

● Recruiter ● Non-recruiter

**C**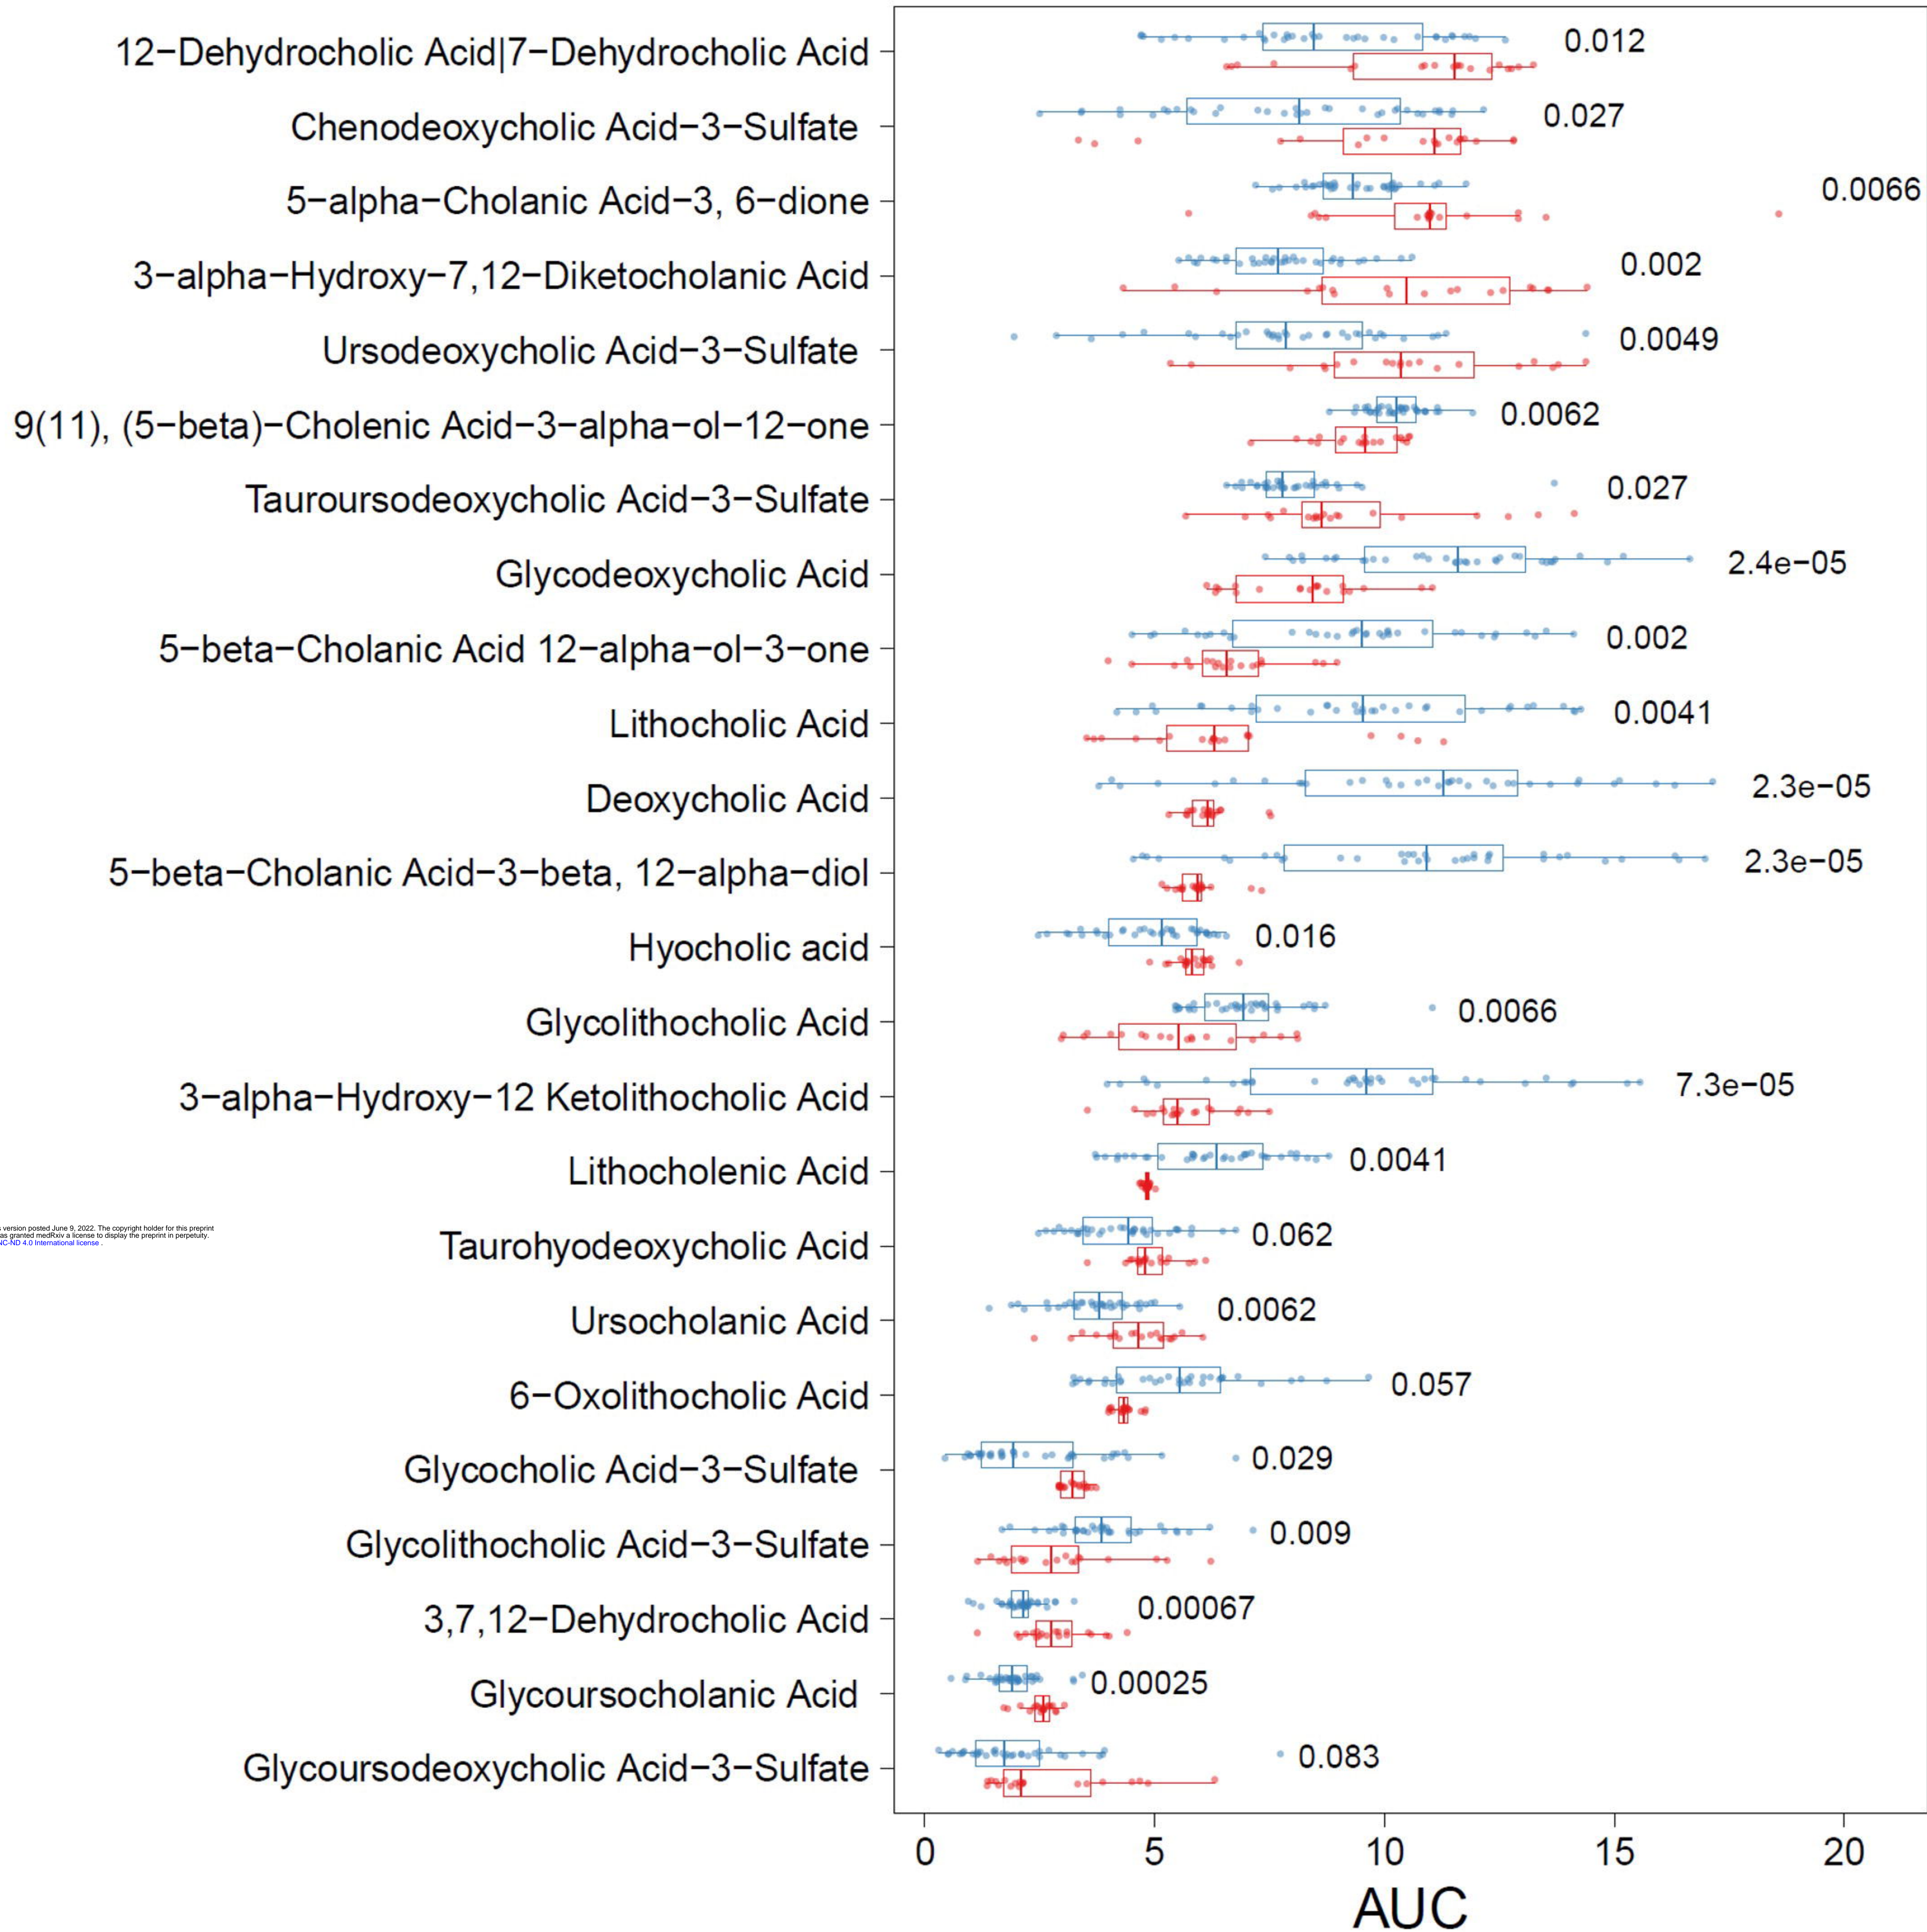



**A**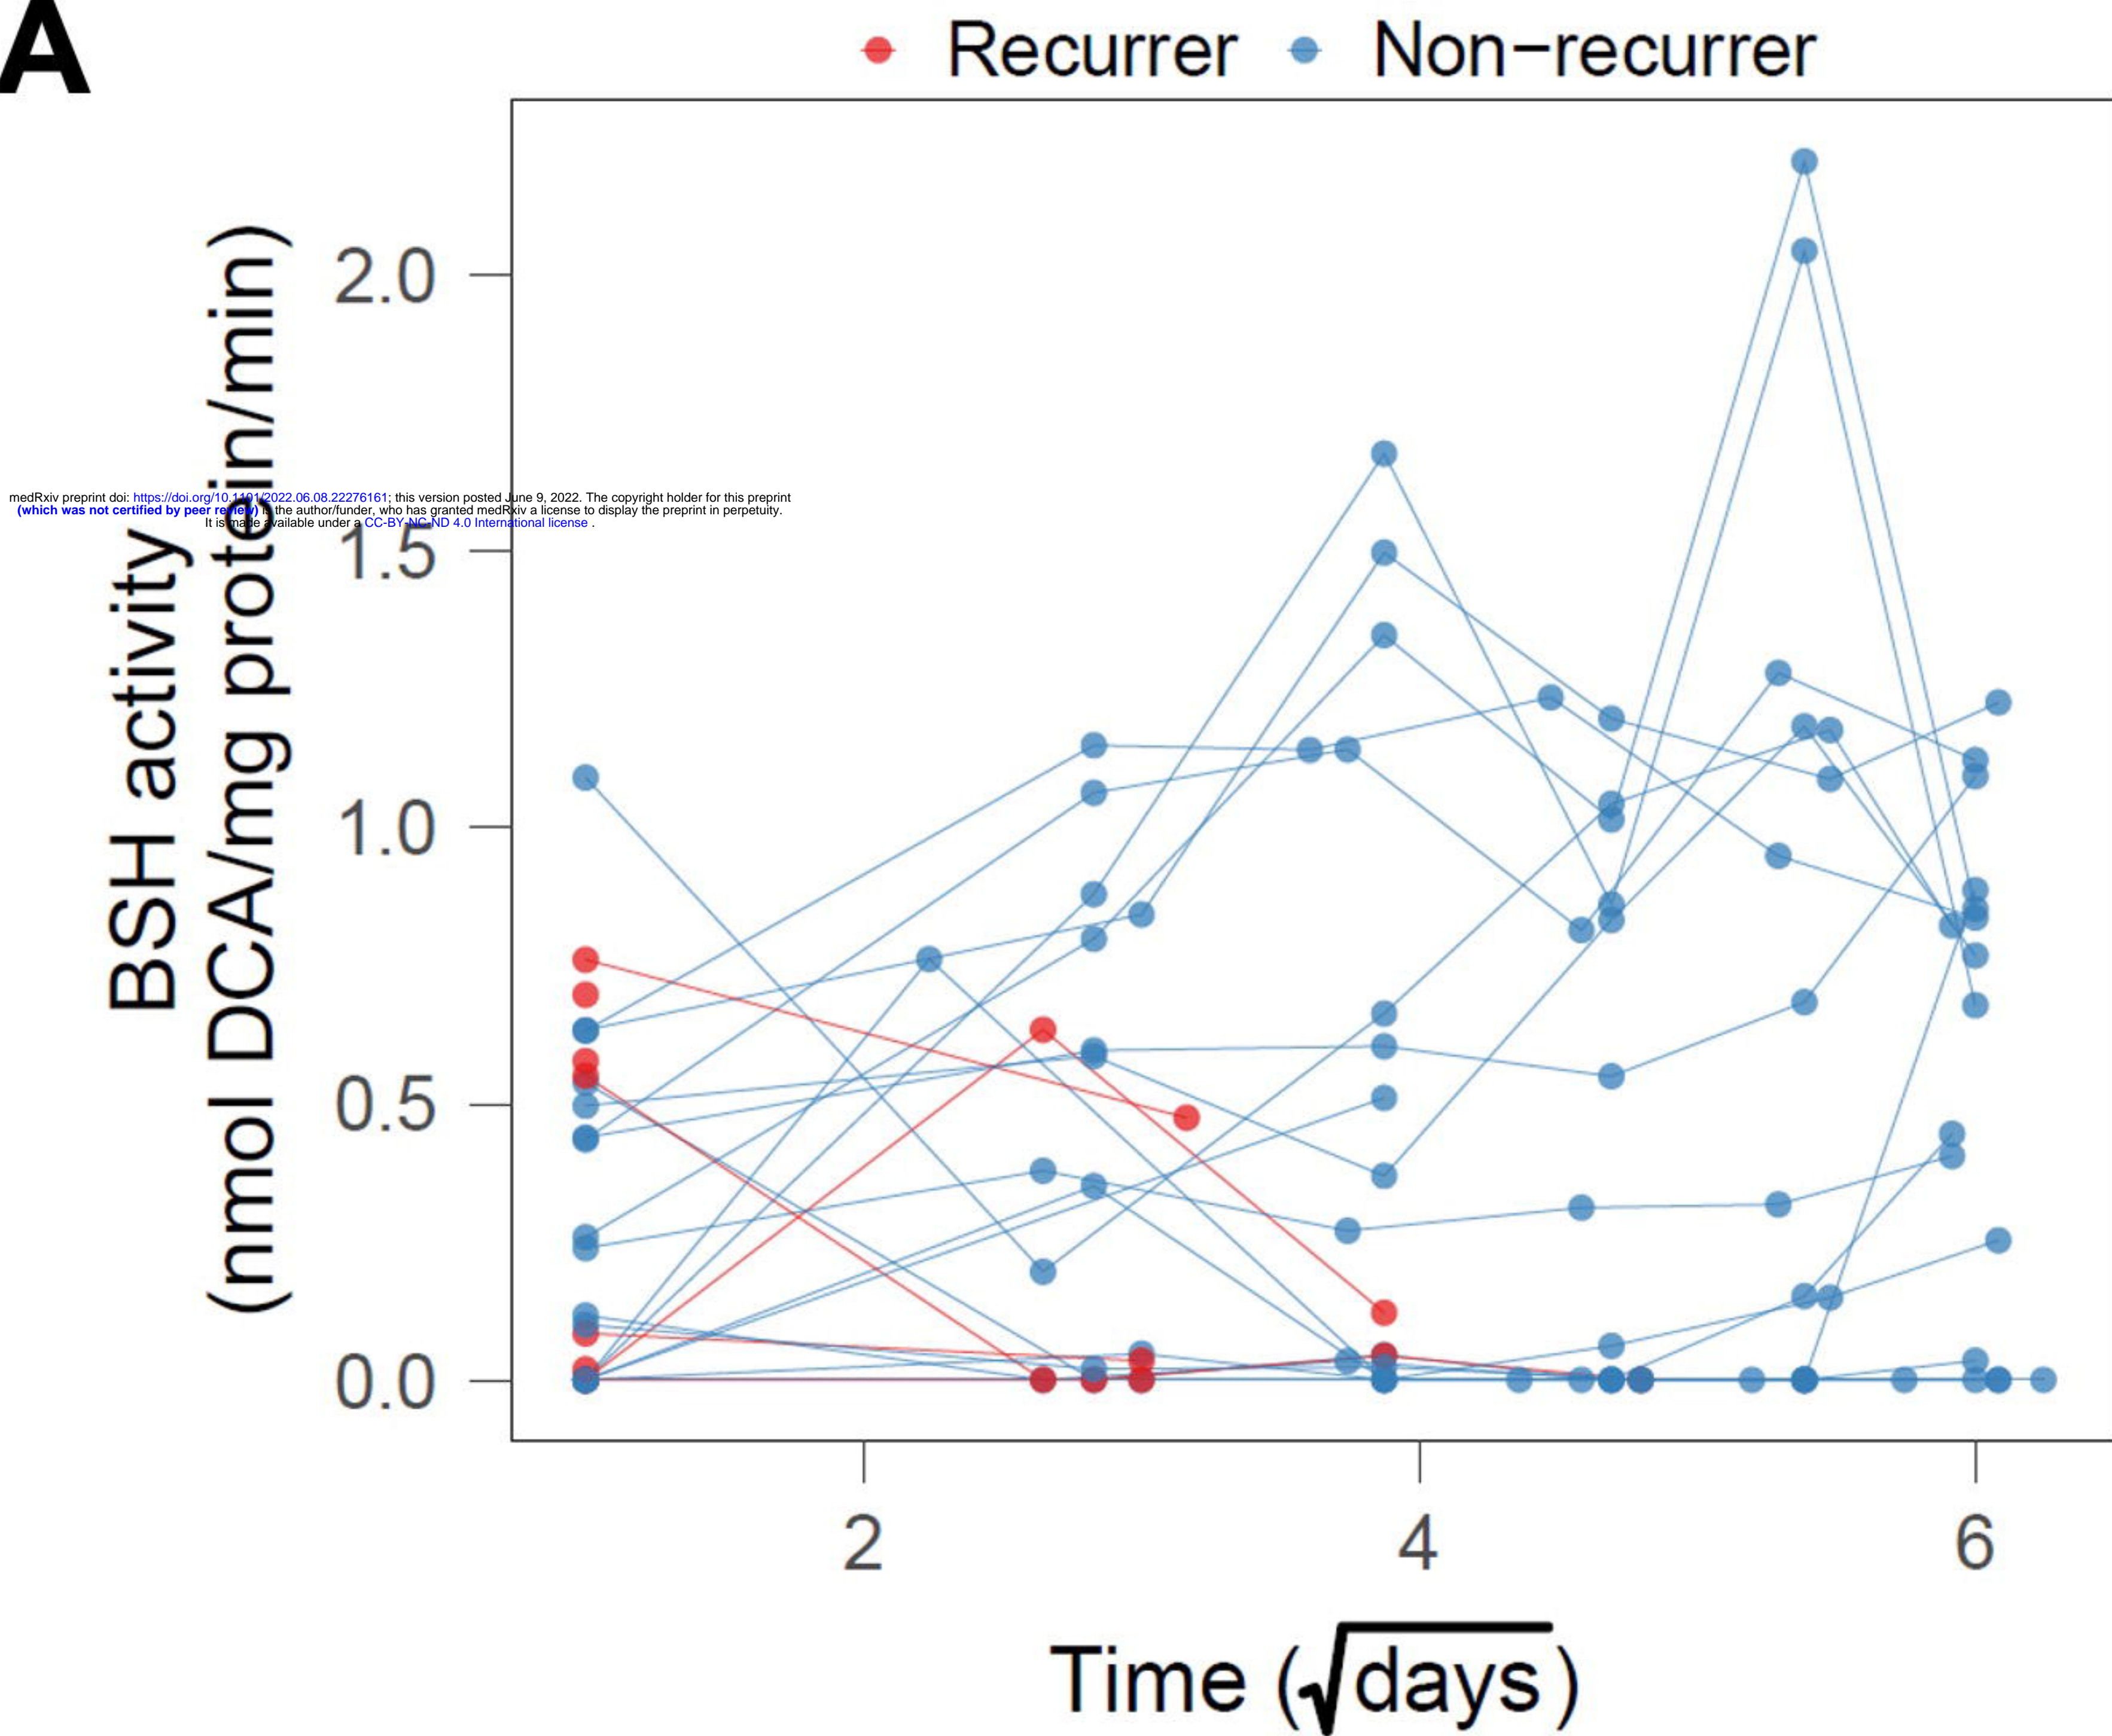**B**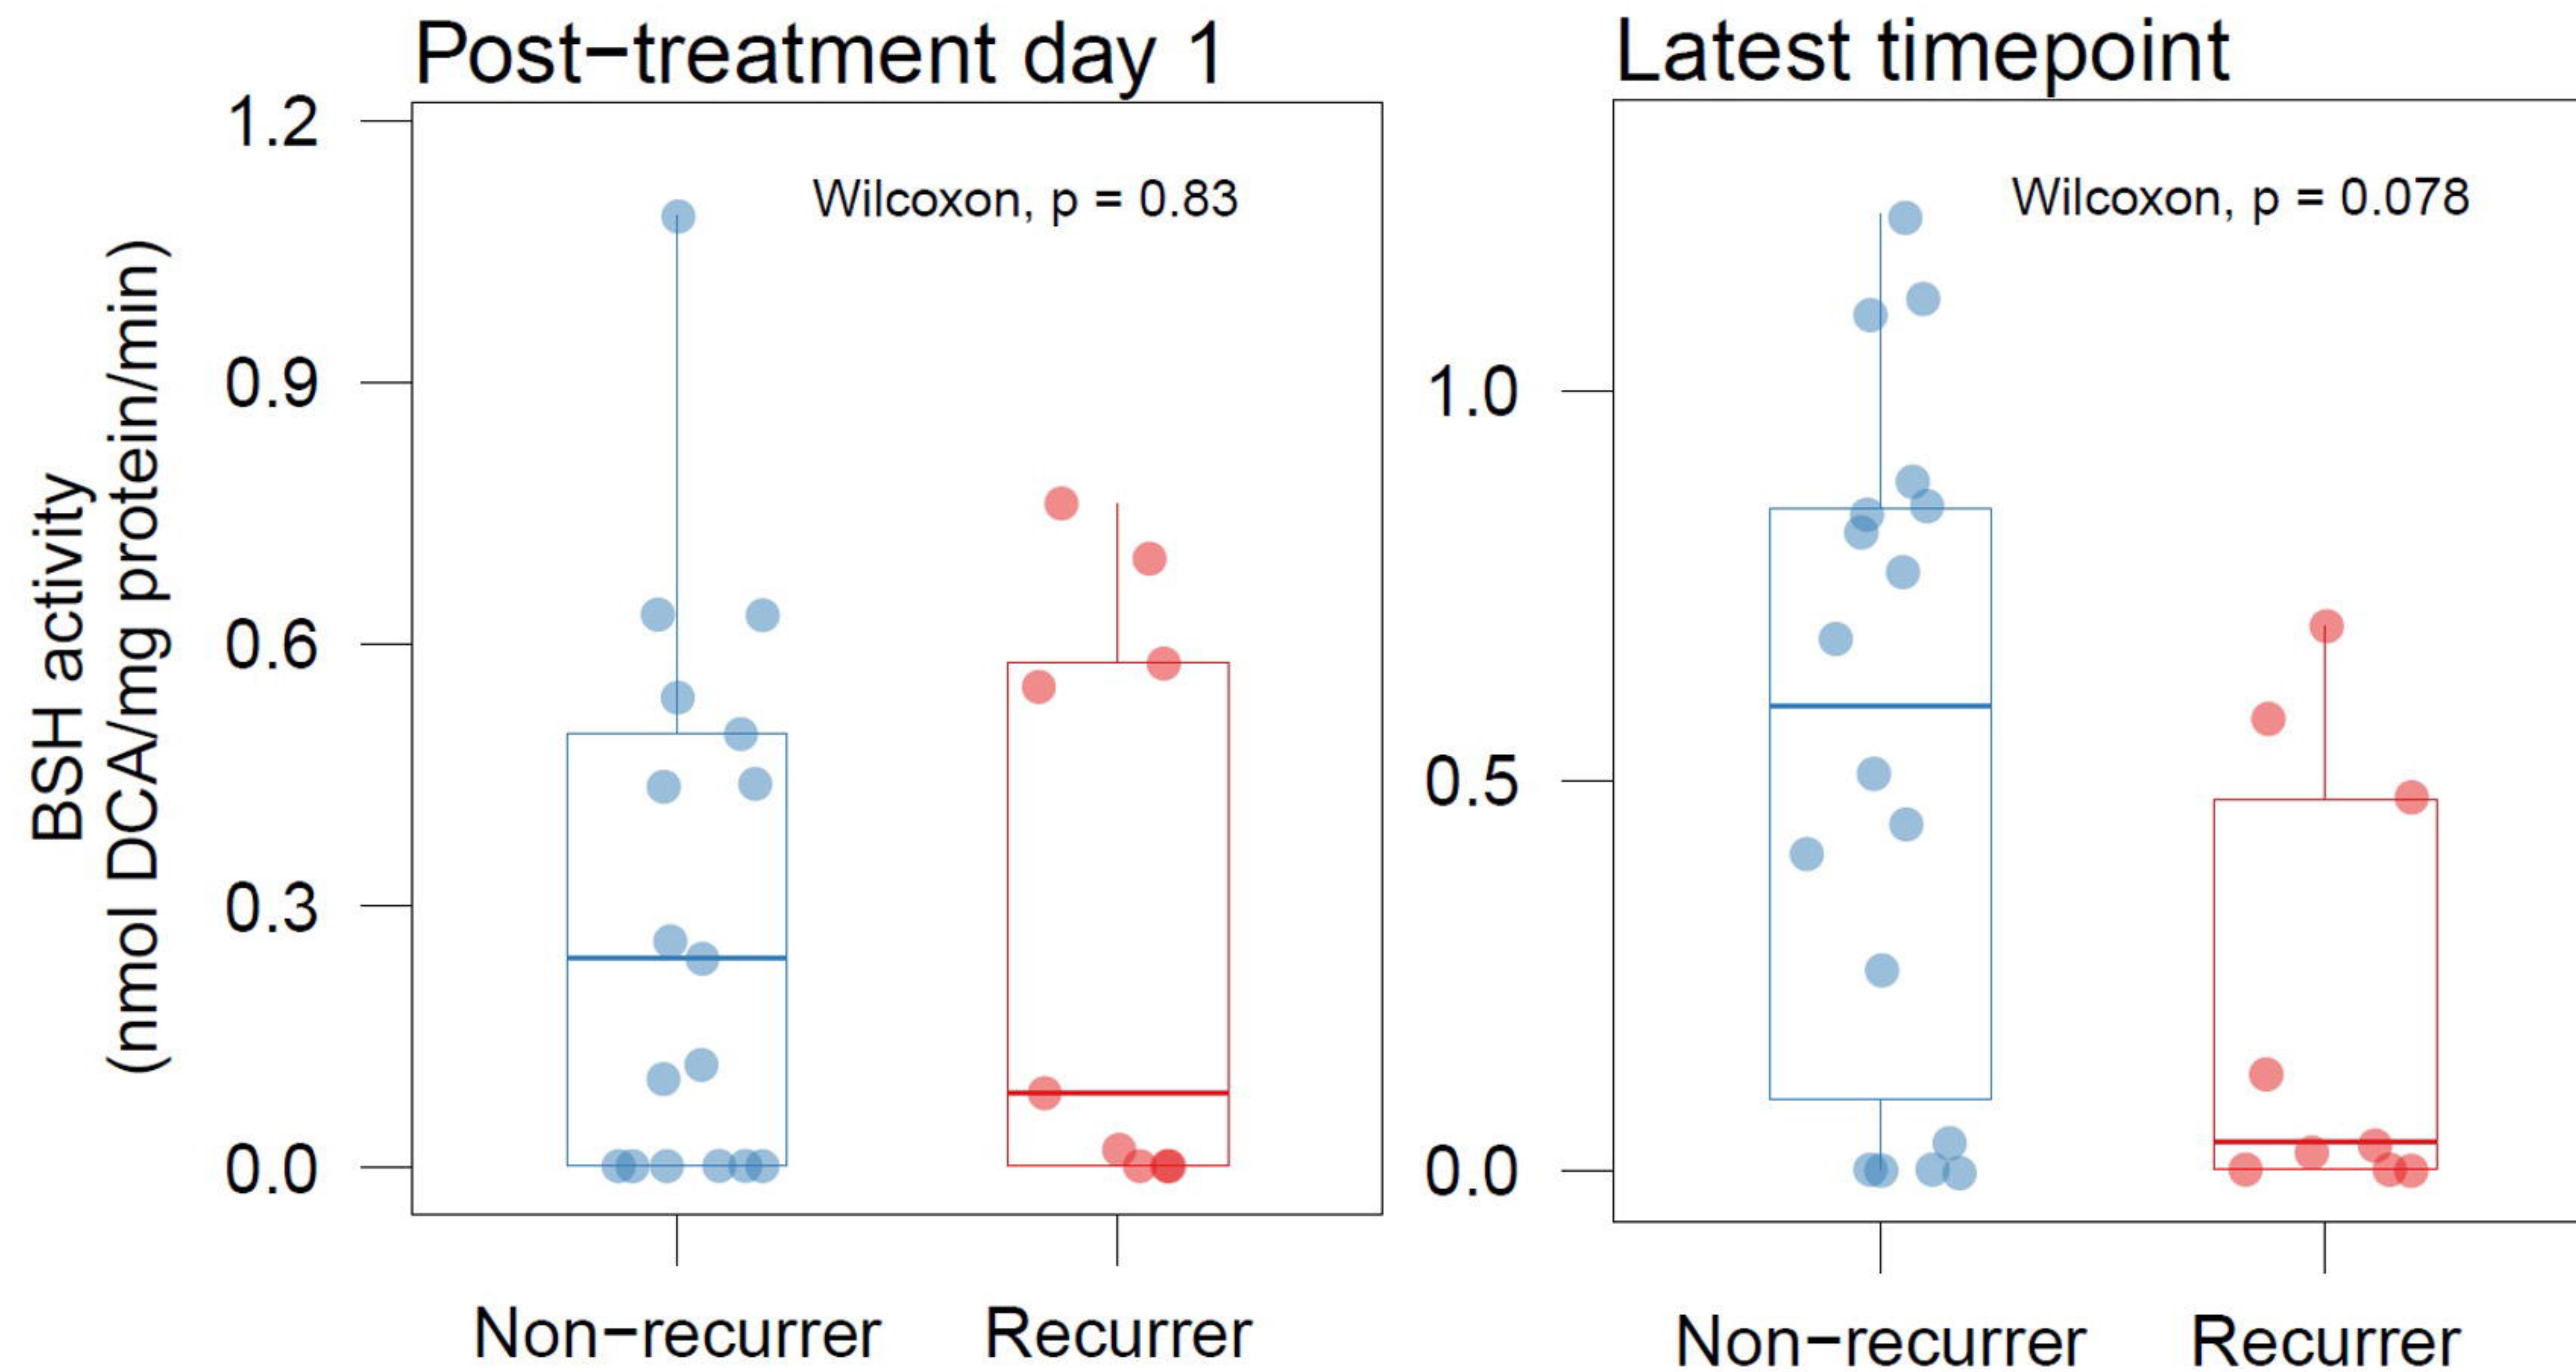



**A**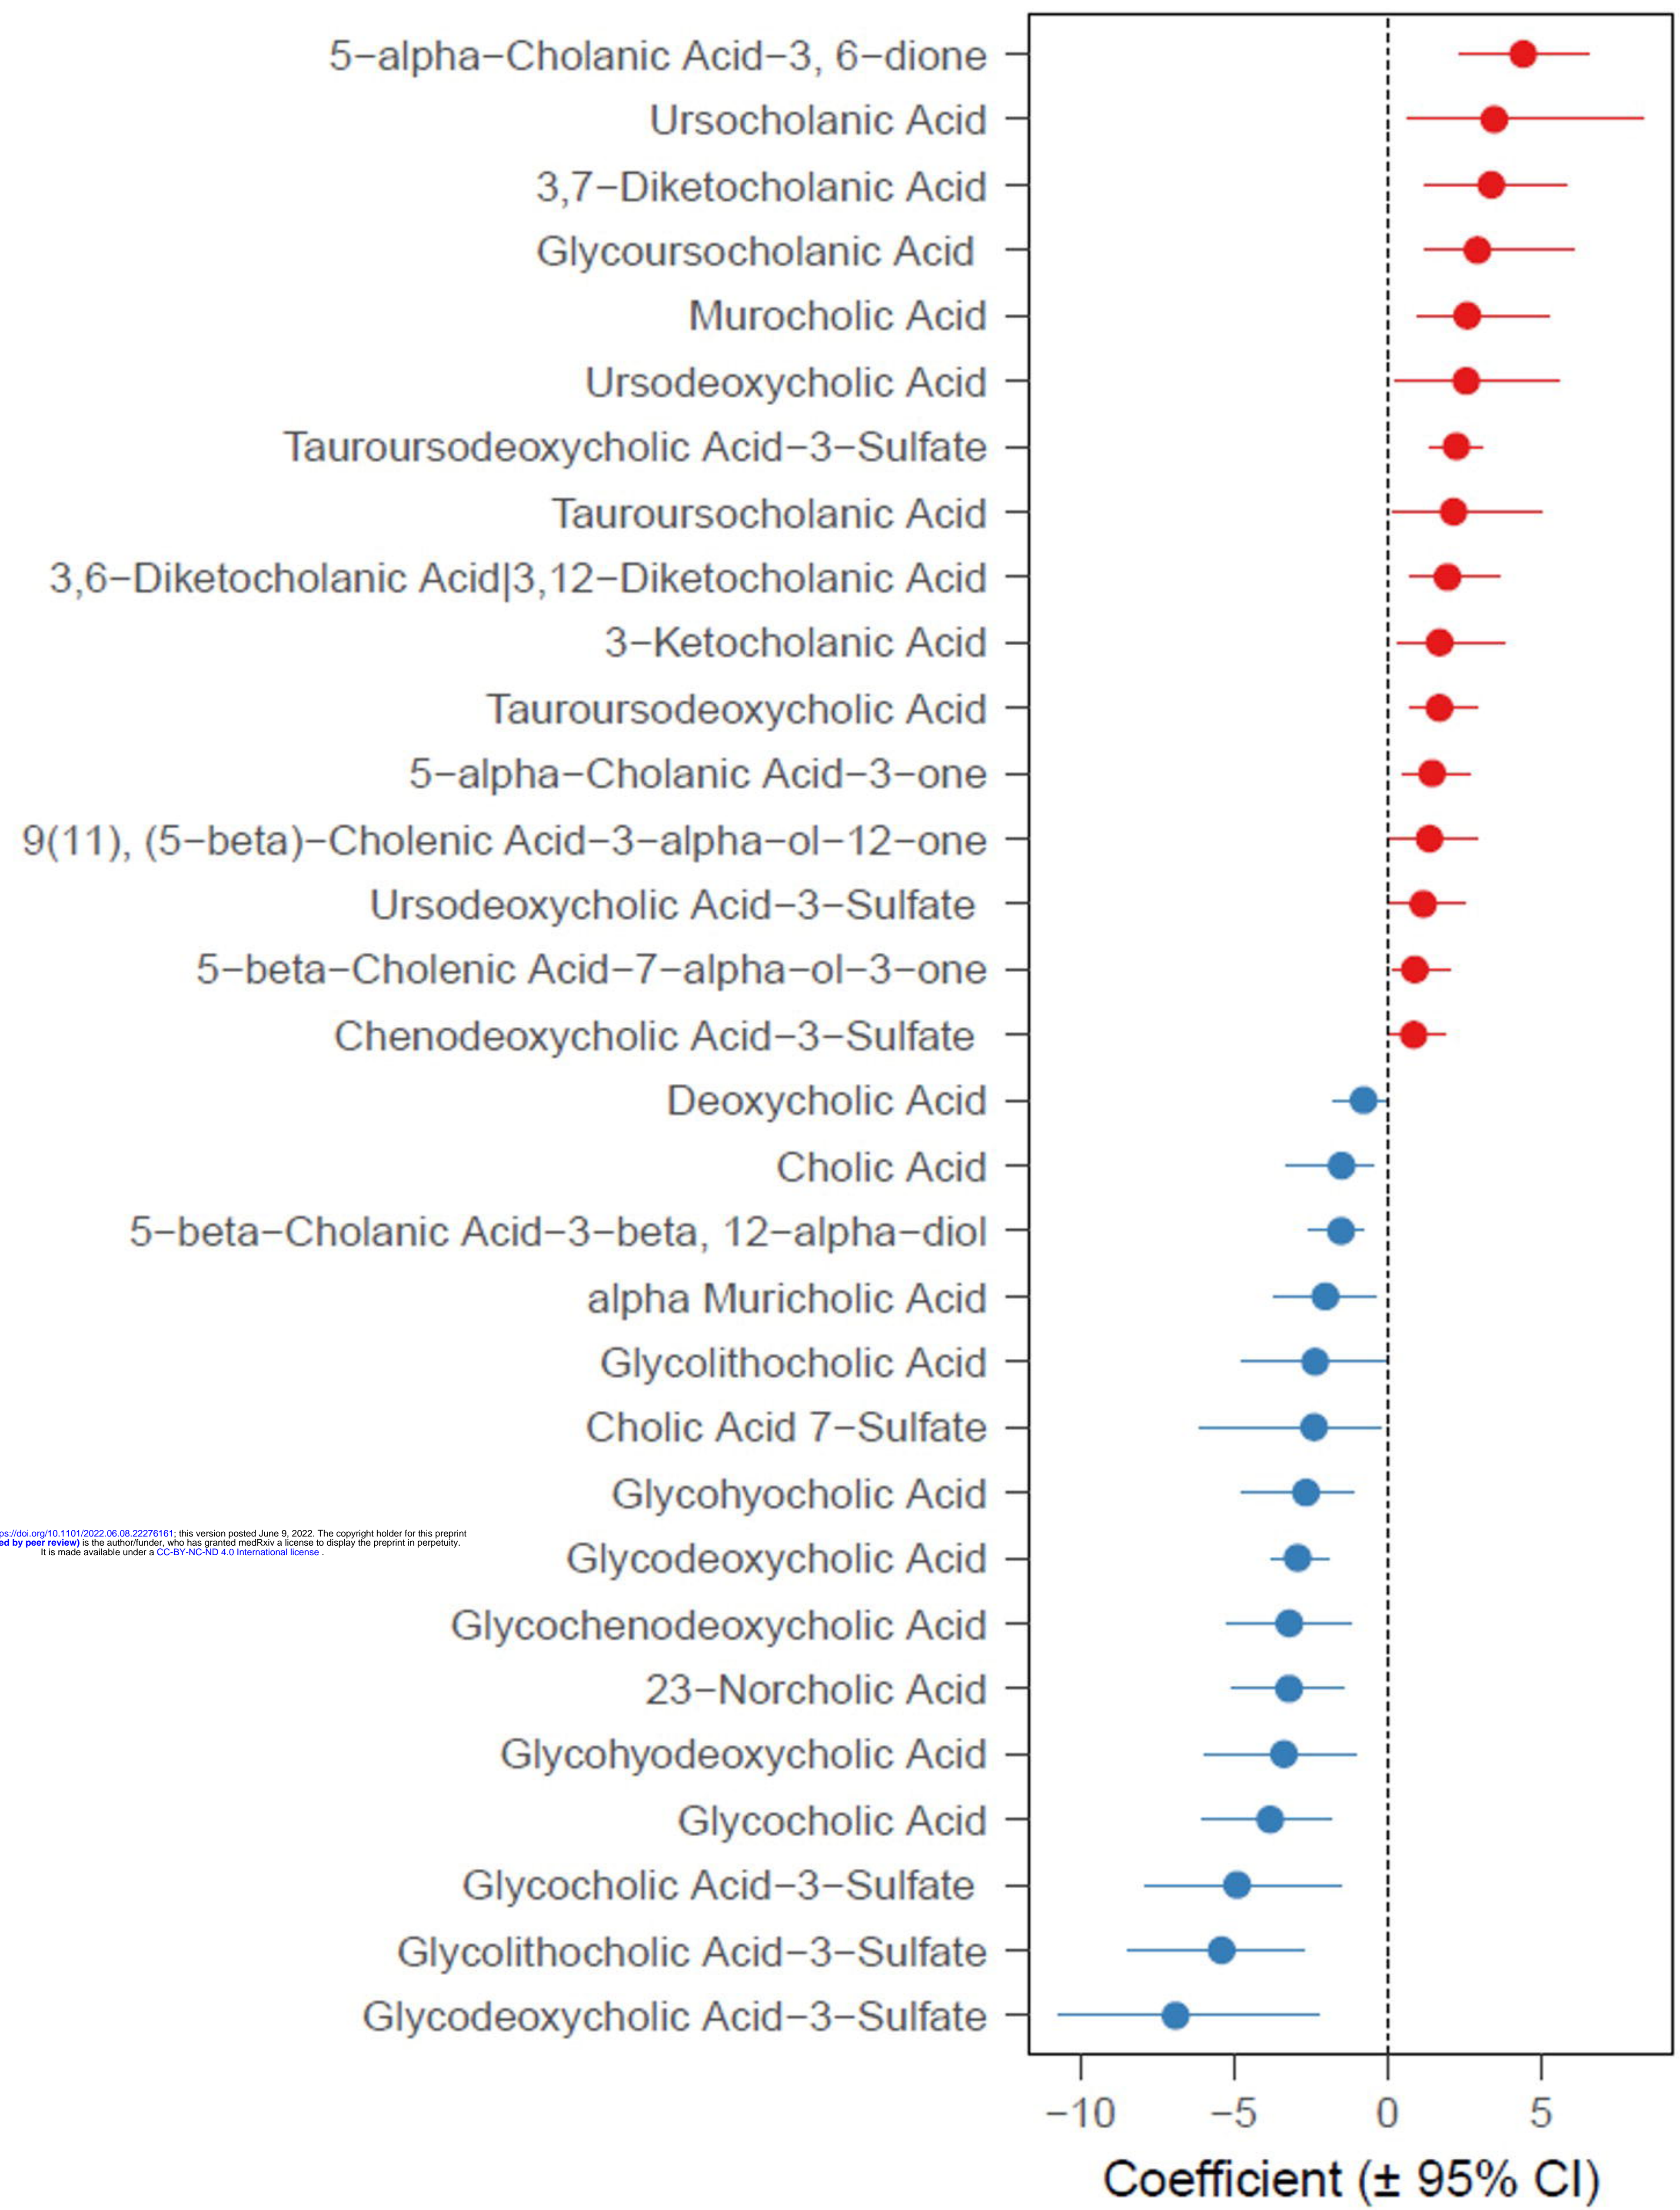

medRxiv preprint doi: <https://doi.org/10.1101/2022.06.08.22278181>; this version posted June 9, 2022. The copyright holder for this preprint (which was not certified by peer review) is the author/funder, who has granted medRxiv a license to display the preprint in perpetuity. It is made available under a CC-BY-NC-ND 4.0 International license.

**B**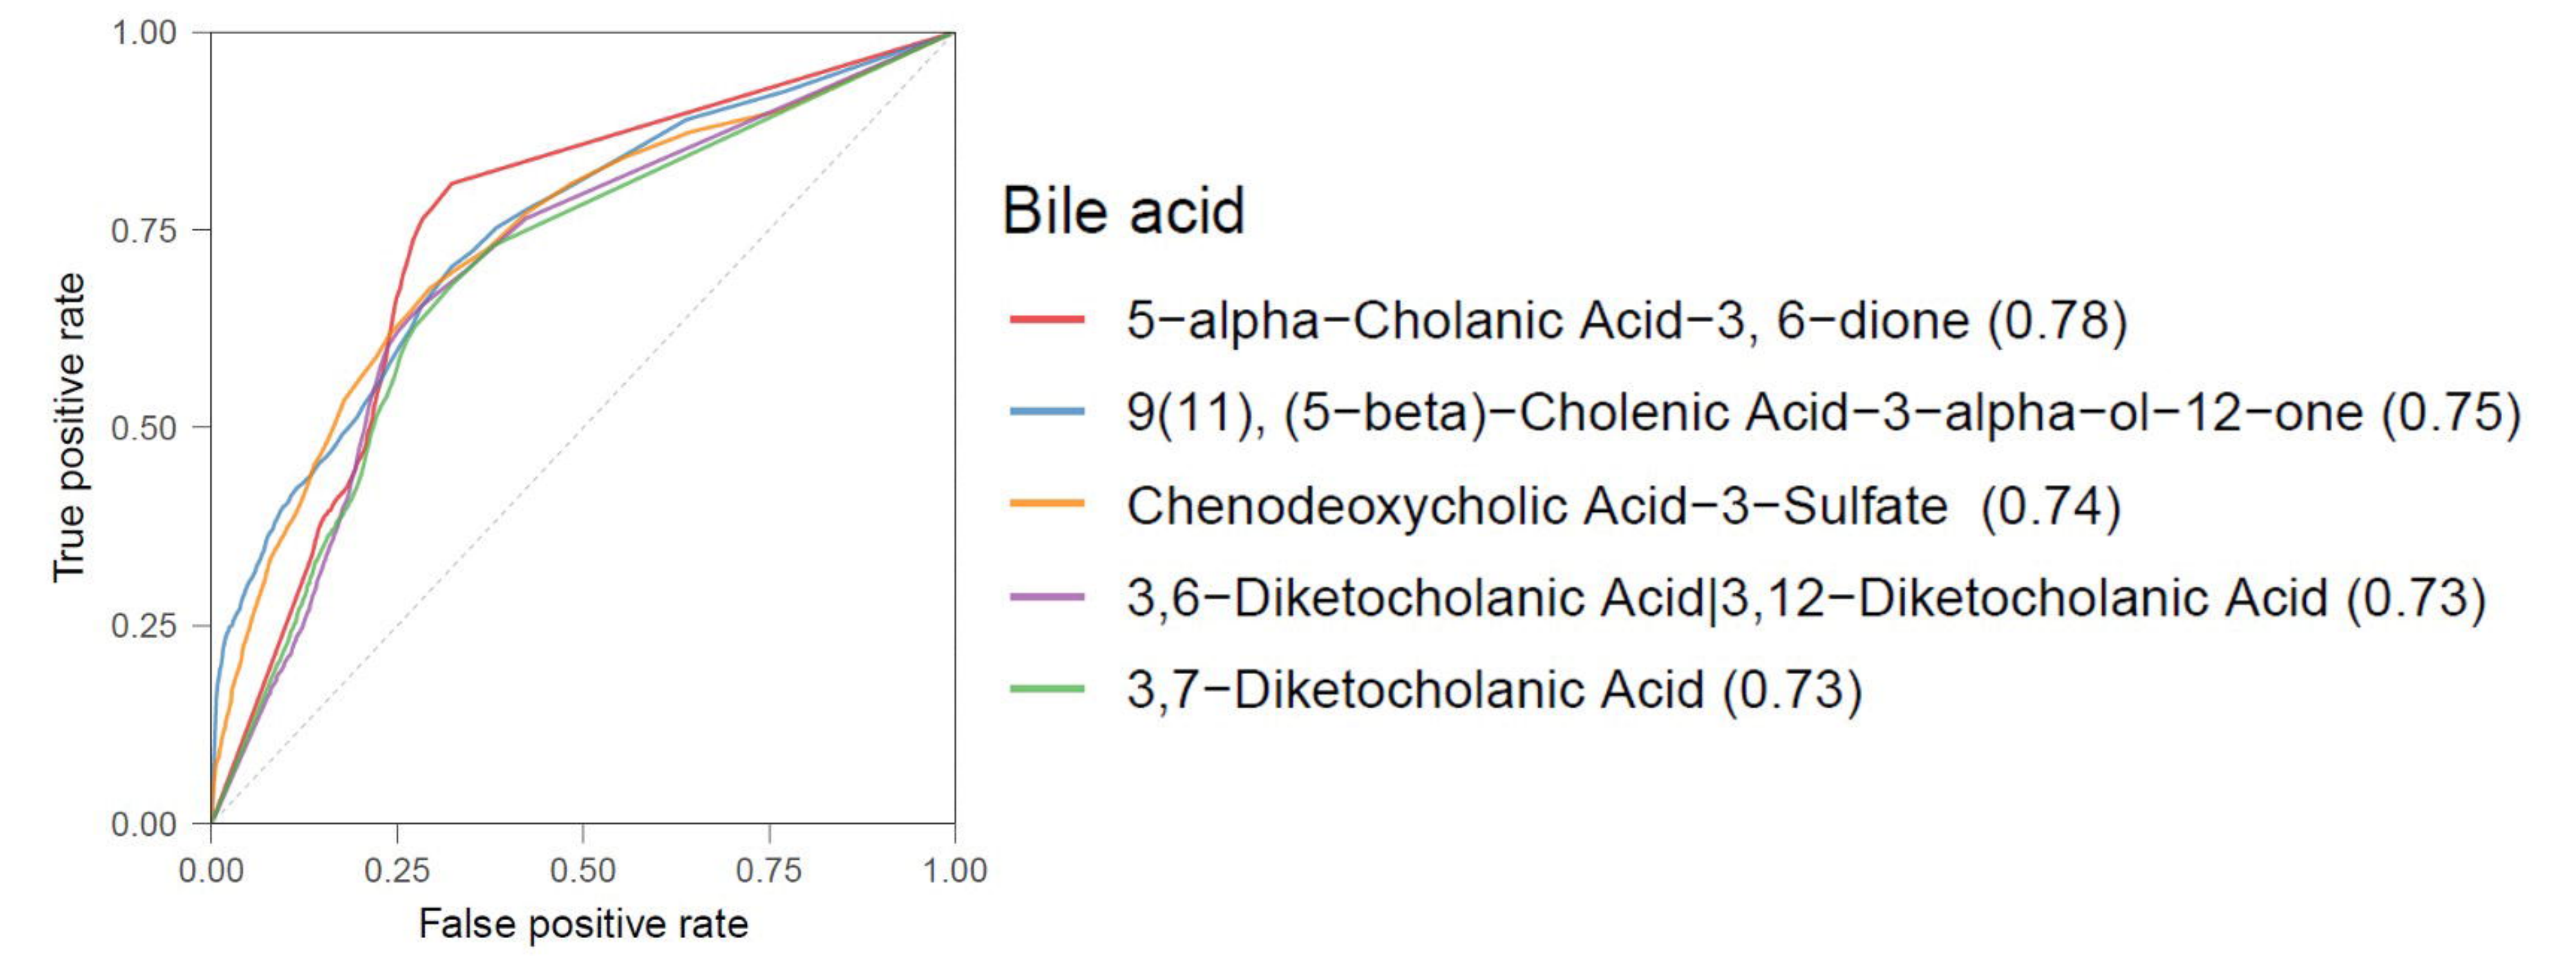**C**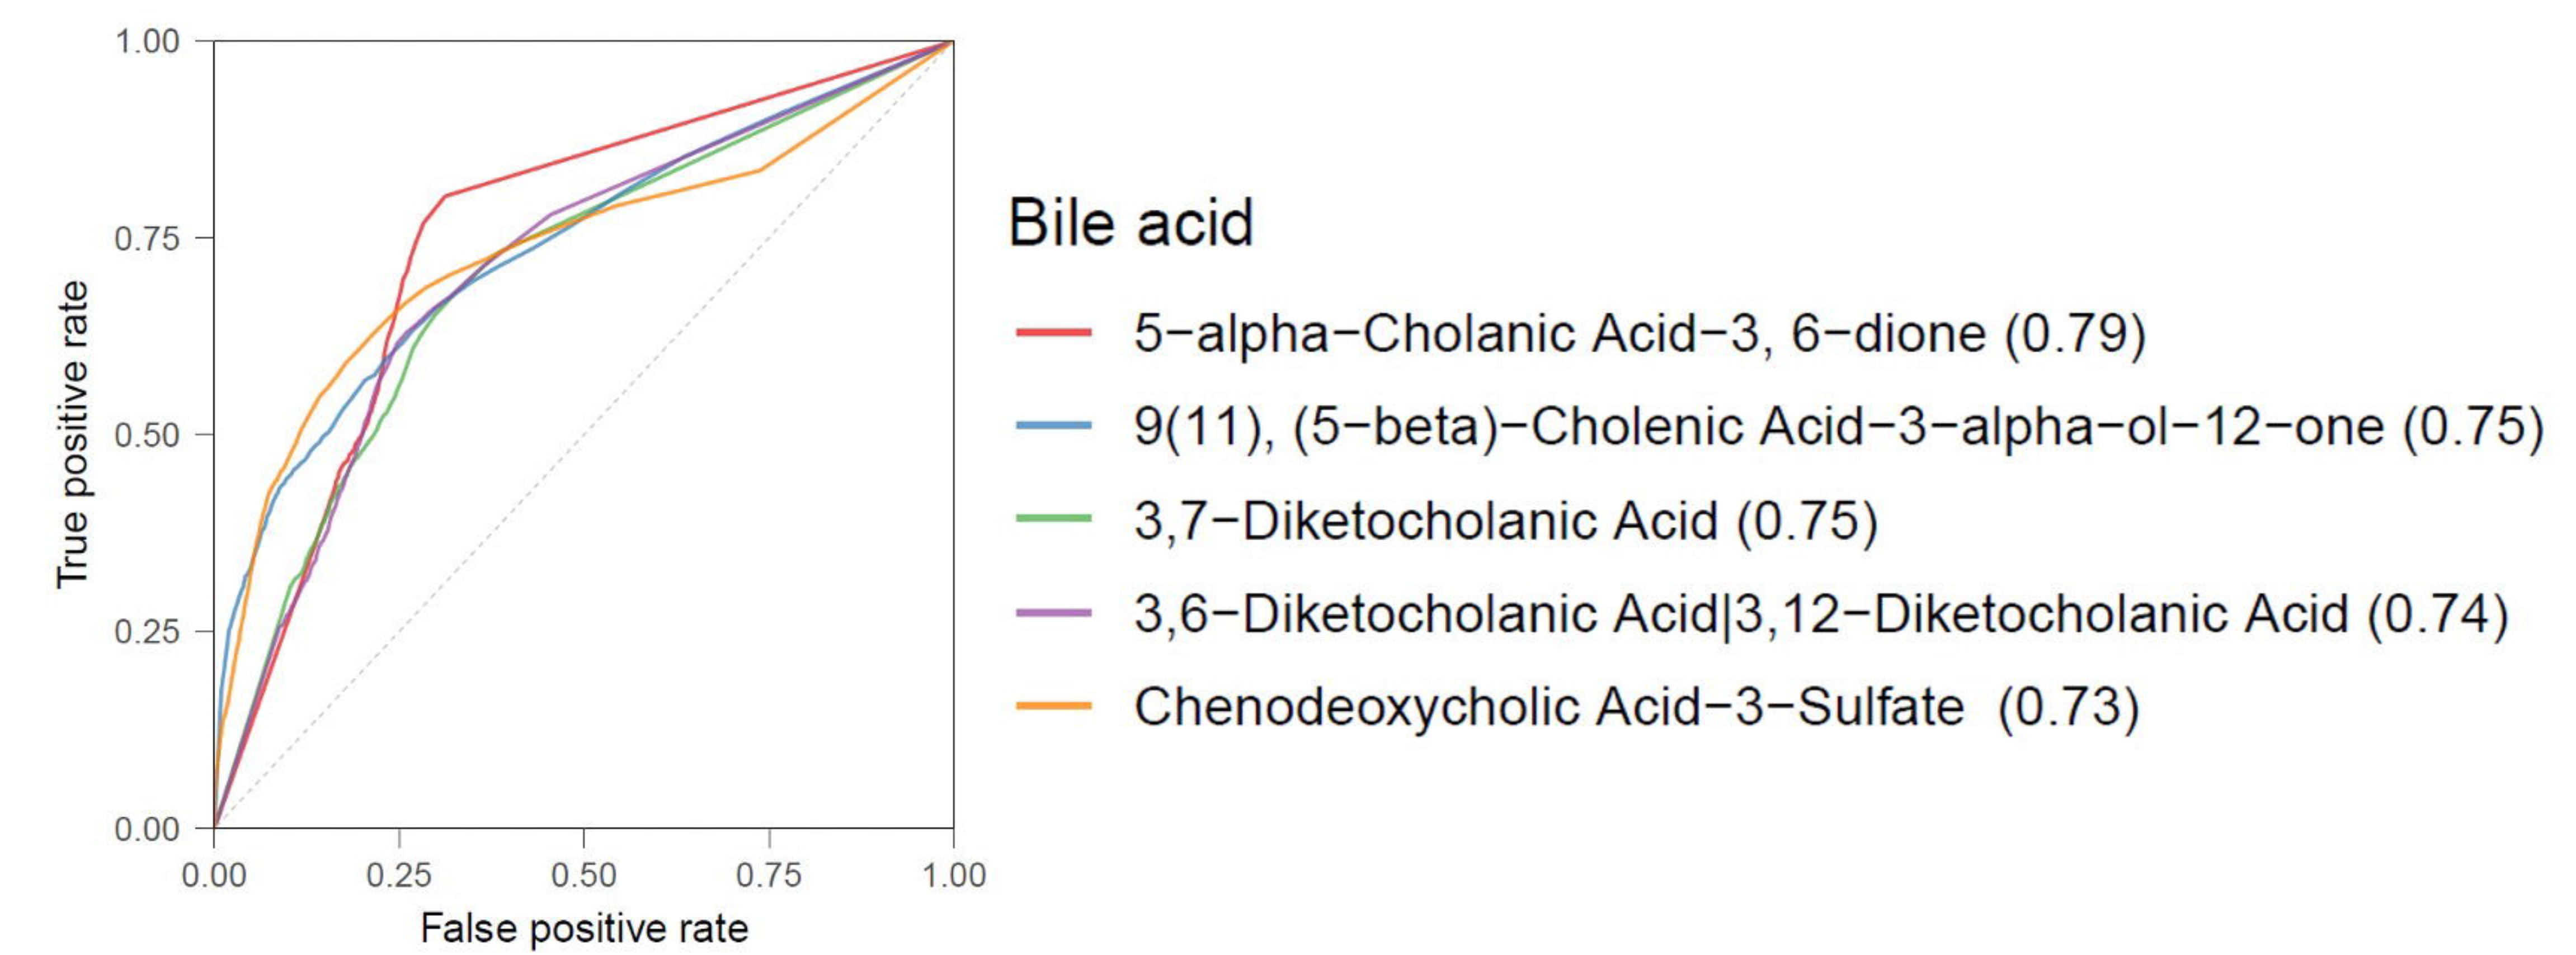**D**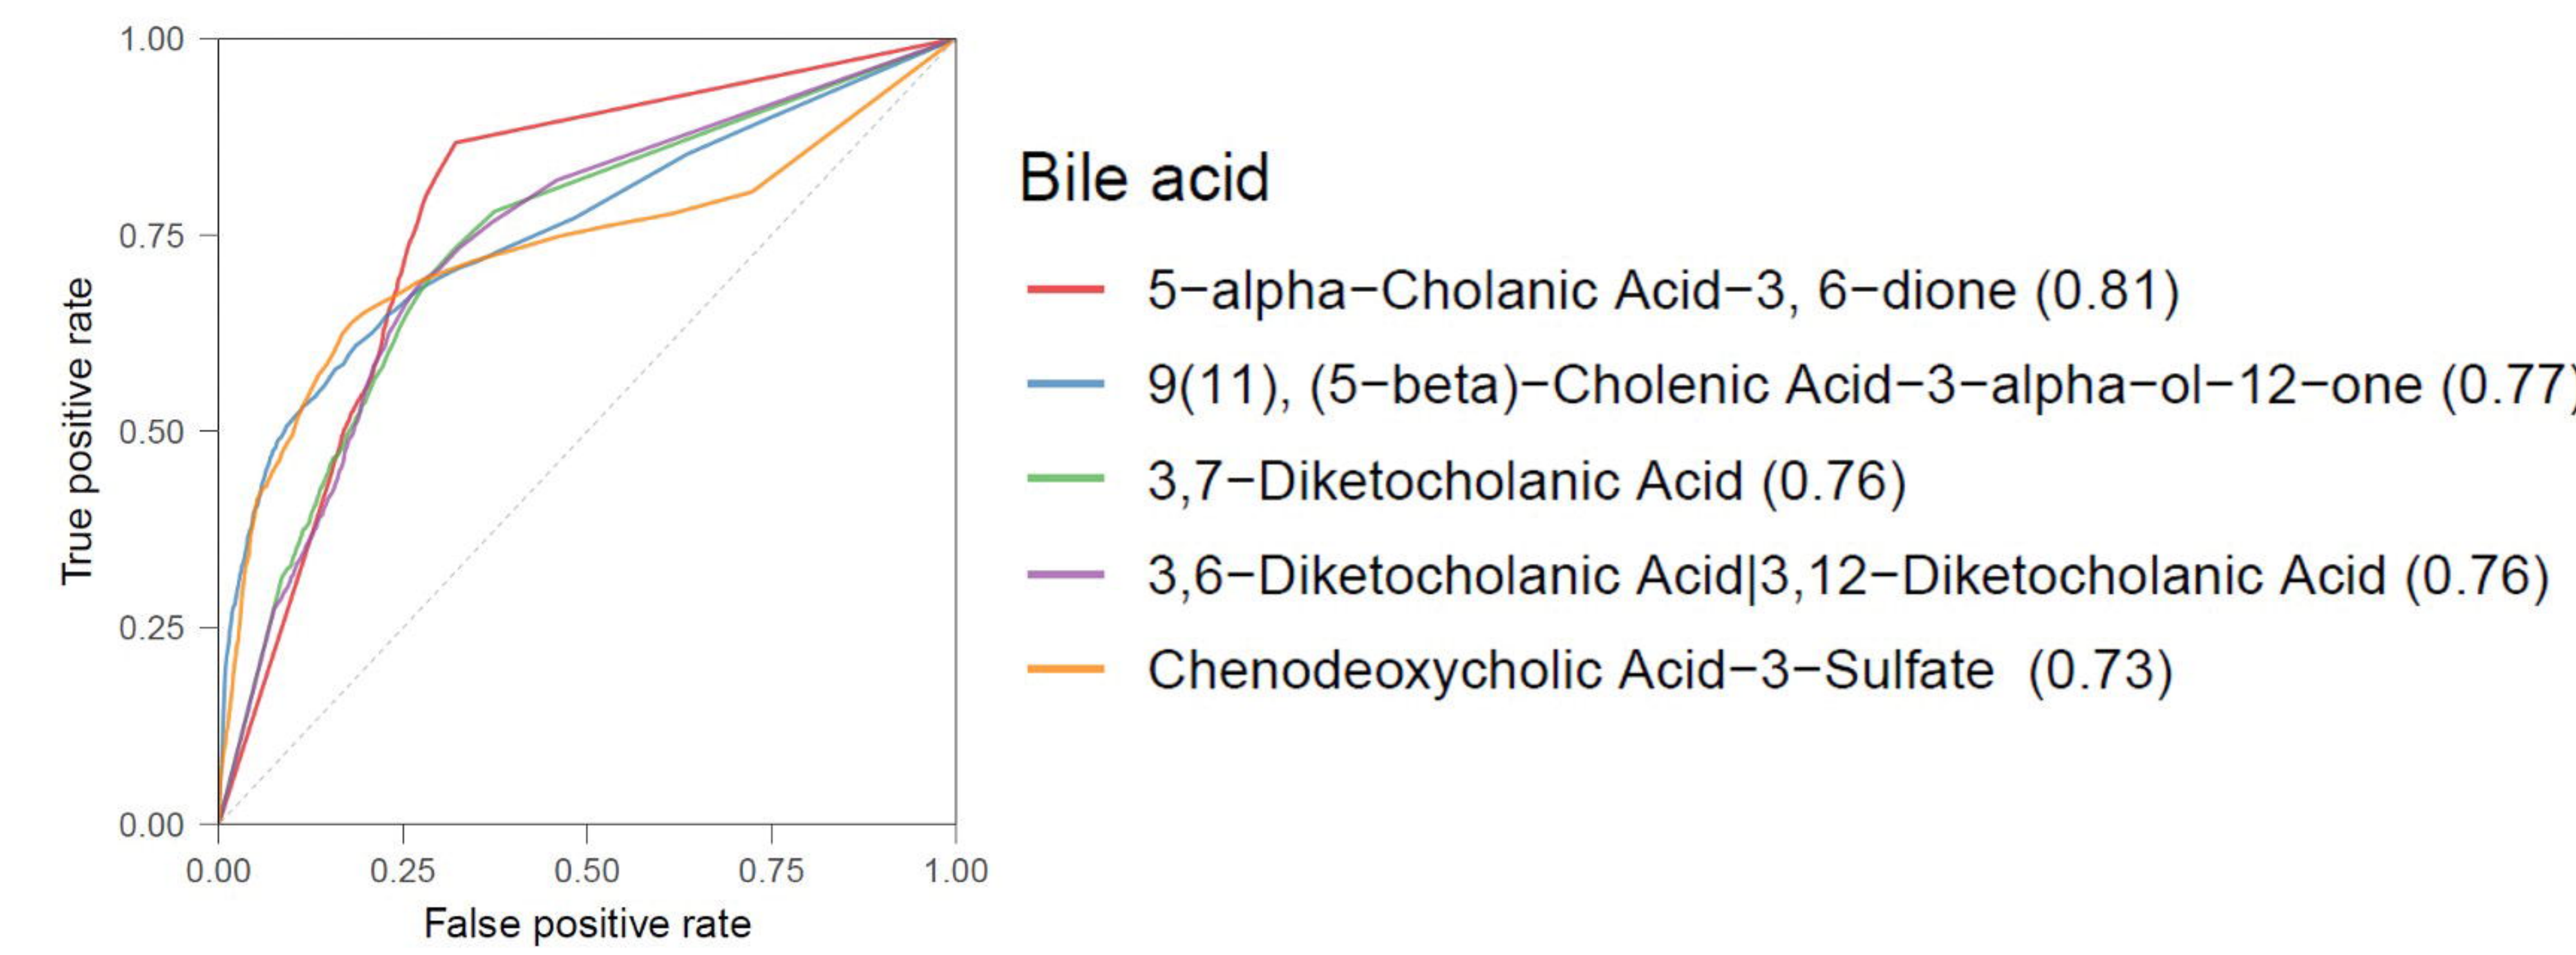

Source: https://medrxiv.org/content/10.1101/2022.06.08.22276161v1.full.pdf
